# Supplementary material for: Comparative proteome profiling of breast tumor cell lines by gel electrophoresis and mass spectrometry reveals an epithelial mesenchymal transition associated protein signature
Source: Royal Society of Chemistry journal article supplement (doi:10.1039/c2mb25401h), 2012-11-29
Supplement: c2mb25401h_2.pdf [file c2mb25401h_2.pdf]

| <b>Supplementary Table 1.</b> List of antibodies used in western blotting |                                       |                 |
|---------------------------------------------------------------------------|---------------------------------------|-----------------|
| <b>Antibody name</b>                                                      | <b>Company</b>                        | <b>Dilution</b> |
| Anti-p27                                                                  | Santa Cruz Biotechnology (sc-527)     | 1:200           |
| Anti- cyclin D1                                                           | Santa Cruz Biotechnology (sc-20044)   | 1:200           |
| Anti-E-cadherin                                                           | Santa Cruz Biotechnology (sc-71009)   | 1:1000          |
| Anti-N-cadherin                                                           | Santa Cruz Biotechnology (sc-59987)   | 1:1000          |
| Anti- $\alpha$ Tubulin                                                    | Santa Cruz Biotechnology (sc-23948)   | 1:2000          |
| Anti-Ezrin                                                                | Santa Cruz Biotechnology (sc-20773)   | 1:1000          |
| Anti-Cofilin                                                              | Santa Cruz Biotechnology (sc-33779)   | 1:1000          |
| Anti-pospho cofilin (ser3)                                                | Santa Cruz Biotechnology (sc-21867-R) | 1:1000          |
| Anti-LDH-B                                                                | Santa Cruz Biotechnology (sc-133731)  | 1:500           |
| Anti- $\beta$ Catenin                                                     | Santa Cruz Biotechnology (sc-1496)    | 1:1000          |
| Anti-pospho-Akt (ser473)                                                  | Cell Signaling (4051)                 | 1:1000          |
| Anti-phospho-myosin light chain 2 (ser19)                                 | Cell Signaling (3671)                 | 1:1000          |
| Anti-pospho-Src (tyr416)                                                  | Cell Signaling (2101)                 | 1:1000          |
| Anti-pospho-p44/42 MAPK (Erk 1/2)<br>(thr202/tyr204)                      | Cell Signaling (4370)                 | 1:2000          |

| <b>Supplementary Table 2.</b> Primer sequences used in the study.<br>Primer blast program ( <a href="http://www.ncbi.nlm.nih.gov/tools/primer-blast/">http://www.ncbi.nlm.nih.gov/tools/primer-blast/</a> ) was used to design specific primer sequences. |                                                                             |        |     |
|-----------------------------------------------------------------------------------------------------------------------------------------------------------------------------------------------------------------------------------------------------------|-----------------------------------------------------------------------------|--------|-----|
| Name                                                                                                                                                                                                                                                      | Sequence                                                                    | Length | Tm  |
| <i>Cofilin</i>                                                                                                                                                                                                                                            | Forward primer GTGGGCGATGTGGGCCAGAC<br>Reverse primer CCAGGGTGCAGCGGTCCTTG  | 280    | 60° |
| <i>LIMK1</i>                                                                                                                                                                                                                                              | Forward primer GTGCGAGATCATCGGGCGGG<br>Reverse primer AACAGCGCACGGTGATGGGG  | 143    | 60° |
| <i>ROCK1</i>                                                                                                                                                                                                                                              | Forward primer TGACTGGTGGTCGGTTGGGGT<br>Reverse primer TCGGAGCGTTTCCCAAGCCC | 271    | 60° |
| <i>Vimentin</i>                                                                                                                                                                                                                                           | Forward primer TGGCCGACGCCATCAACACC<br>Reverse primer CACCTCGACGCGGGCTTTGT  | 257    | 60° |
| <i>E-cadherin</i>                                                                                                                                                                                                                                         | Forward primer ACCACCTCCACAGCCACCGT<br>Reverse primer GTCCAGTTGGCACTCGCCCC  | 518    | 60° |
| <i>N-cadherin</i>                                                                                                                                                                                                                                         | Forward primer ATTGTGGGTGCGGGGCTTGG<br>Reverse primer GGGTGTGGGGCTGCAGATCG  | 344    | 60° |
| <i>Snail</i>                                                                                                                                                                                                                                              | Forward primer CCTGCTGGCAGCCATCCCAC<br>Reverse primer GGCAGCGTGTGGCTTCGGAT  | 420    | 60° |
| <i>Slug</i>                                                                                                                                                                                                                                               | Forward primer ACGCCCAGCTACCCAATGGC<br>Reverse primer AGGGCGCCCAGGCTCACATA  | 325    | 60° |
| <i>Twist</i>                                                                                                                                                                                                                                              | Forward primer CAGCGCACCCAGTCGCTGAA<br>Reverse primer CCAGGCCCCCTCCATCCTCC  | 234    | 60° |
| <i>Profilin1</i>                                                                                                                                                                                                                                          | Forward primer ATGGCCGGGTGGAACGCCTA<br>Reverse primer GAACGCCGAAGGTGGGAGGC  | 413    | 60° |
| <i>Actin beta</i>                                                                                                                                                                                                                                         | Forward primer CCACGGGTGCTTCCAGCTCC<br>Reverse primer GGAGGGGCGGACTCGTCAT   | 422    | 60° |
| <i>GAPDH</i>                                                                                                                                                                                                                                              | Forward primer GCATGGCCTTCCGTGTCCCC<br>Reverse primer CAATGCCAGCCCCAGCGTCA  | 216    | 60° |
| <i>Keratin 8</i>                                                                                                                                                                                                                                          | Forward primer TATTGCCAACCGCAGCCGGG<br>Reverse primer GCGCCAGAGCCAAAGCTGGA  | 534    | 60° |
| <i>Keratin 18</i>                                                                                                                                                                                                                                         | Forward primer TGGCCATGCGCCAGTCTGTG<br>Reverse primer GTCCCTCTGCCCCGGTCTGT  | 555    | 60° |
| <i>Keratin 19</i>                                                                                                                                                                                                                                         | Forward primer CGCGGCGTATCCGTGTCTC<br>Reverse primer GCGCCTCCGTTTCTGCCAGT   | 862    | 60° |
| <i>ANXA1</i>                                                                                                                                                                                                                                              | Forward primer GGTGGTCCCGGATCAGCGGT<br>Reverse primer GGCCCTTCATGGCAGCACGA  | 301    | 60° |
| <i>ANXA2</i>                                                                                                                                                                                                                                              | Forward primer AGCGTGCCCCACCTCCAGAA<br>Reverse primer ATCTCGCGTCCCCTTGCCCT  | 195    | 60° |

|                   |                                                                               |     |     |
|-------------------|-------------------------------------------------------------------------------|-----|-----|
| <i>ANXA3</i>      | Forward primer AGGGCGCGGGAACAAACGAA<br>Reverse primer GCCGGCGTGTTCCCTCACACA   | 445 | 60° |
| <i>Transgelin</i> | Forward primer TGCCCGAGAACCCACCTCC<br>Reverse primer GCCTGGGAGGCCCCCTCTGTT    | 328 | 60° |
| <i>CLIC1</i>      | Forward primer GCAGTGCTGTGCCCTCCCAG<br>Reverse primer CCCGGGCGTAGGCATTGCTC    | 394 | 60° |
| <i>Vinculin</i>   | Forward primer GGCTTGTGGCCGAAGGGCAT<br>Reverse primer GTACCAACCGCAGCCGCCTT    | 394 | 60° |
| <i>LDH-B</i>      | Forward primer AGCAAGAAGGGGAGAGTCGGC<br>Reverse primer GGCAGCTGCTGGGATGAATGC  | 258 | 60° |
| <i>18S</i>        | Forward primer GCCGCTAGAGGTGAAATTCTTG<br>Reverse primer CATTCTTGGCAAATGCTTTCG | 66  | 60° |
| <i>Eplin</i>      | Forward primer GCCTGGCAGTCCGTTCCACC<br>Reverse primer TGCAGCCAGGACACCCACCT    | 530 | 60° |
| <i>Fascin</i>     | Forward primer TCCCCCGCCGAGAAGTGAG<br>Reverse primer AGGTCCATACCCTGGCGCGT     | 464 | 60° |

| Supplementary Table 3. Protein spots differentially expressed between MCF-7 and MDA-231 cell lines |              |                   |                  |                                                  |             |   |                 |
|----------------------------------------------------------------------------------------------------|--------------|-------------------|------------------|--------------------------------------------------|-------------|---|-----------------|
| Spot number                                                                                        | Protein name | Nominal mass (MW) | Matched Peptides | Peptides sequence                                | Peptide Ion |   | Instrument type |
|                                                                                                    |              |                   |                  |                                                  | m/z         | z |                 |
| Spot 1                                                                                             | CLIC1        | 27248             | 4                | K.GVTFNVTTVDTK.R                                 | 641.15      | 2 | ESI-TRAP        |
|                                                                                                    |              |                   |                  | K.NSNPALNDNLEK.G                                 | 664.72      | 2 |                 |
|                                                                                                    |              |                   |                  | K.LAALNPESNTAGLDIFAK.F                           | 923.06      | 2 |                 |
|                                                                                                    |              |                   |                  | K.VLDNYLTSPLPEEVDETSAEDEGVSR.K                   | 998.53      | 3 |                 |
| Spot 2                                                                                             | K1C19        | 44079             | 14               | R.VLDELTAR.T                                     | 515.44      | 2 | ESI-TRAP        |
|                                                                                                    |              |                   |                  | R.IVLQIDNAR.L                                    | 521.43      | 2 |                 |
|                                                                                                    |              |                   |                  | K.DAEAWFTSR.T                                    | 541.71      | 2 |                 |
|                                                                                                    |              |                   |                  | R.LEQEIATYR.S                                    | 561.94      | 2 |                 |
|                                                                                                    |              |                   |                  | R.MSVEADINGLR.R + Oxidation (M)                  | 610.95      | 2 |                 |
|                                                                                                    |              |                   |                  | K.NHEEEISTLR.G                                   | 614.45      | 2 |                 |
|                                                                                                    |              |                   |                  | R.ALEAANGELEVK.I                                 | 622.87      | 2 |                 |
|                                                                                                    |              |                   |                  | R.SQYEVMAEQNR.K                                  | 677.99      | 2 |                 |
|                                                                                                    |              |                   |                  | K.AALEDTLAETEAR.F                                | 695.55      | 2 |                 |
|                                                                                                    |              |                   |                  | R.QSSATSSFGLGGGSR.F                              | 778.11      | 2 |                 |
|                                                                                                    |              |                   |                  | R.DYSHYYTTIQDLR.D                                | 559.29      | 3 |                 |
|                                                                                                    |              |                   |                  | R.TLQGLEIELQSQLSMK.A + Oxidation (M)             | 917.84      | 2 |                 |
| R.SLLEGQEDHYNNLSASK.V                                                                              | 635.99       | 3                 |                  |                                                  |             |   |                 |
| R.GQVGGQVSVEVDSAPGTDLAK.I                                                                          | 1007.71      | 2                 |                  |                                                  |             |   |                 |
| Spot 3                                                                                             | K1C18        | 48029             | 4                | R.AQIFANTVDNAR.I                                 | 660.26      | 2 | ESI-TRAP        |
|                                                                                                    |              |                   |                  | R.TVQSLEIDLDSMR.N + Oxidation (M)                | 761.90      | 2 |                 |
|                                                                                                    |              |                   |                  | R.GGMGSGGLATGIAGGLAGMGGIQNEK.E + 2 Oxidation (M) | 765.23      | 3 |                 |
|                                                                                                    |              |                   |                  | R.YALQMEQLNGILLHLESELAQTR.A + Oxidation (M)      | 896.36      | 3 |                 |
| Spot 4                                                                                             | GDIR2        | 23031             | 2                |                                                  |             |   |                 |

|        |                  |                  |        |                                           |         |   |          |
|--------|------------------|------------------|--------|-------------------------------------------|---------|---|----------|
|        |                  |                  |        | K.TLLGDGPVVTDPK.A                         | 656.11  | 2 | ESI-TRAP |
|        |                  |                  |        | K.ELQEMDKDDESLIK.Y + Oxidation (M)        | 854.84  | 2 |          |
| Spot 5 | 2AAA             | 66039            | 6      | K.LTQDQDQDVVK.Y                           | 580.61  | 2 | ESI-TRAP |
|        |                  |                  |        | K.ELVSDANQHVK.S                           | 620.52  | 2 |          |
|        |                  |                  |        | R.NLCSDDTMPVR.R                           | 654.17  | 2 |          |
|        |                  |                  |        | K.DNTIEHLLPLFLAQLK.D                      | 622.23  | 3 |          |
|        |                  |                  |        | R.QLSQSLLPAIVELAEDAK.W                    | 642.48  | 3 |          |
|        |                  |                  |        | R.QLSQSLLPAIVELAEDAK.W                    | 963.4   | 2 |          |
| Spot 6 | CH60             | 61157            | 4      | R.ALMLQGVDLLADAVAVTMGPK.G + Oxidation (M) | 710.44  | 3 | ESI-TRAP |
|        |                  |                  |        | R.TALLDAAGVASLLTTAEVVVTEIPK.E             | 1241.68 | 2 |          |
|        |                  |                  |        | R.TALLDAAGVASLLTTAEVVVTEIPK.E             | 828.41  | 3 |          |
|        |                  |                  |        | K.LVQDVANNTNEEAGDGTATTATVLAR.S            | 854.48  | 3 |          |
| Spot 7 | GRP75 /<br>ANXA6 | 73680 /<br>75873 | 13 / 8 | K.GVFEVK.S                                | 678.42  | 1 | ESI-TRAP |
|        |                  |                  |        | R.QAASSLQQASLK.L                          | 616.37  | 2 |          |
|        |                  |                  |        | K.DAGQISGLNVL.R                           | 622.01  | 2 |          |
|        |                  |                  |        | K.VQQTQVQDLFGR.A                          | 646.06  | 2 |          |
|        |                  |                  |        | R.AQFEGIVTDLIR.R                          | 681.50  | 2 |          |
|        |                  |                  |        | K.SDIGEVILVGGMTR.M                        | 723.98  | 2 |          |
|        |                  |                  |        | R.TTPSVVAFTADGER.L                        | 725.96  | 2 |          |
|        |                  |                  |        | R.EQQIVIQSSGGLSK.D                        | 737.91  | 2 |          |
|        |                  |                  |        | R.VINEPTAAALAYGLDK.S                      | 823.54  | 2 |          |
|        |                  |                  |        | K.NAVITVPAYFNDSQR.Q                       | 847.98  | 2 |          |
|        |                  |                  |        | K.MEEFKDQLPADECNK.L                       | 618.93  | 3 |          |
|        |                  |                  |        | R.VEAVNMAEGIIHDTETK.M                     | 619.9   | 3 |          |
|        |                  |                  |        | R.VEAVNMAEGIIHDTETK.M + Oxidation (HW)    | 625.18  | 3 |          |
|        |                  |                  |        | /                                         |         |   |          |
|        |                  |                  |        | K.DAISGIGTDEK.C                           | 553.30  | 2 |          |
|        |                  |                  |        | R.DAFVAIVQSVK.N                           | 589.27  | 2 |          |

|         |      |       |    |  |                                       |         |   |          |
|---------|------|-------|----|--|---------------------------------------|---------|---|----------|
|         |      |       |    |  | R.EEGGENLDQAR.E                       | 609.34  | 2 |          |
|         |      |       |    |  | K.SLEDALSSDTSGHFR.R                   | 811.35  | 2 |          |
|         |      |       |    |  | K.SLHQAIEGDTSGDFLK.A                  | 573.57  | 3 |          |
|         |      |       |    |  | K.SLHQAIEGDTSGDFLK.A                  | 859.93  | 2 |          |
|         |      |       |    |  | K.GLGTDEDTHIDIITHR.S                  | 884.94  | 2 |          |
|         |      |       |    |  | K.GLGTDEDTHIDIITHR.S                  | 590.56  | 3 |          |
| Spot 8  | PLST | 70811 | 3  |  | R.QFVTPADVVSIGNPK.L                   | 729.75  | 2 | ESI-TRAP |
|         |      |       |    |  | R.VYALPEDLVEVKPK.M                    | 799.83  | 2 |          |
|         |      |       |    |  | K.EGICALGGTSELSSEGTQHSYSEEEK.Y        | 929.17  | 3 |          |
| Spot 9  | ENOA | 47169 | 15 |  | K.LMIEMDG TENK.S                      | 640.54  | 2 | ESI-TRAP |
|         |      |       |    |  | K.LMIEMDG TENK.S + Oxidation (M)      | 648.70  | 2 |          |
|         |      |       |    |  | K.LMIEMDG TENK.S + 2 Oxidation (M)    | 656.66  | 2 |          |
|         |      |       |    |  | R.GNPTVEVDLFTSK.G                     | 703.78  | 2 |          |
|         |      |       |    |  | R.YISPDQLADLYK.S                      | 713.34  | 2 |          |
|         |      |       |    |  | K.LAQANGWGVMSHR.S + Oxidation (M)     | 771.68  | 2 |          |
|         |      |       |    |  | K.VNQIGSVTESLQACK.L                   | 817.52  | 2 |          |
|         |      |       |    |  | R.AAVPSGASTGIYEALRL.D                 | 902.80  | 2 |          |
|         |      |       |    |  | K.LAMQEFMILPVGAANFR.E                 | 954.45  | 2 |          |
|         |      |       |    |  | K.LAMQEFMILPVGAANFR.E + Oxidation (M) | 962.54  | 2 |          |
|         |      |       |    |  | K.DATNVGDEGGFAPNILENK.E               | 981.04  | 2 |          |
|         |      |       |    |  | K.DATNVGDEGGFAPNILENK.E               | 654.51  | 3 |          |
|         |      |       |    |  | R.SGETEDTFIADLVVGLCTGQIK.T            | 1177.01 | 2 |          |
| Spot 10 | COF1 | 18719 | 6  |  | R.YALYDATYETK.E                       | 669.49  | 2 | ESI-TRAP |
|         |      |       |    |  | K.LGGSAVISLEGKPL.-                    | 671.06  | 2 |          |
|         |      |       |    |  | K.KEDLVFIFWAPESAPLK.S                 | 996.03  | 2 |          |
|         |      |       |    |  | K.EILVGDVGQTVDDPYATFVK.M              | 1083.97 | 2 |          |

|         |      |       |    |                                         |         |   |          |
|---------|------|-------|----|-----------------------------------------|---------|---|----------|
|         |      |       |    | K.EILVGDVGQTVDDPYATFVK.M                | 723.02  | 3 |          |
|         |      |       |    | K.NIILEEGKEILVGDVGQTVDDPYATFVK.M        | 1021.87 | 3 |          |
| Spot 11 | THIO | 12015 | 1  | K.TAFQEALDAAGDK.L                       | 668.71  | 2 | ESI-TRAP |
| Spot 12 | K2C7 | 51386 | 4  | R.SMQDVVEDFK.N                          | 599.79  | 2 | ESI-TRAP |
|         |      |       |    | R.SMQDVVEDFK.N + Oxidation (M)          | 607.46  | 2 |          |
|         |      |       |    | R.TAAENEFVVLK.K                         | 611.26  | 2 |          |
|         |      |       |    | R.GQLEALQVDGGR.L                        | 621.99  | 2 |          |
| Spot 13 | K2C8 | 53671 | 6  | R.SLDMDSIIAEVK.A                        | 660.61  | 2 | ESI-TRAP |
|         |      |       |    | R.SLDMDSIIAEVK.A + Oxidation (M)        | 668.68  | 2 |          |
|         |      |       |    | R.ASLEAAIADAEQR.G                       | 672.78  | 2 |          |
|         |      |       |    | R.LEGLTDEINFLR.Q                        | 710.31  | 2 |          |
|         |      |       |    | K.LEAELGNMQGLVEDFK.N + Oxidation (M)    | 905.22  | 2 |          |
|         |      |       |    | R.ELQSQISDTSVVLSMDNSR.S + Oxidation (M) | 1063.06 | 2 |          |
| Spot 14 | K2C8 | 53671 | 17 | K.LSELEAALQR.A                          | 1129.79 | 1 | ESI-TRAP |
|         |      |       |    | K.YEELQSLAGK.H                          | 1137.6  | 1 |          |
|         |      |       |    | R.SLDMDSIIAEVK.A                        | 660.92  | 2 |          |
|         |      |       |    | R.SLDMDSIIAEVK.A + Oxidation (M)        | 668.73  | 2 |          |
|         |      |       |    | R.ASLEAAIADAEQR.G                       | 672.7   | 2 |          |
|         |      |       |    | R.ASLEAAIADAEQR.G                       | 672.98  | 2 |          |
|         |      |       |    | R.TEMENEFVLIK.K                         | 676.78  | 2 |          |
|         |      |       |    | R.TEMENEFVLIK.K + Oxidation (M)         | 684.67  | 2 |          |
|         |      |       |    | R.LEGLTDEINFLR.Q                        | 710.52  | 2 |          |
|         |      |       |    | K.LEAELGNMQGLVEDFK.N                    | 896.97  | 2 |          |
|         |      |       |    | K.LEAELGNMQGLVEDFK.N + Oxidation (M)    | 904.99  | 2 |          |
|         |      |       |    | R.SNMDNMFESYINNLR.R                     | 924.49  | 2 |          |
|         |      |       |    | R.SNMDNMFESYINNLR.R                     | 616.76  | 3 |          |

|         |       |       |    |                                          |         |   |          |
|---------|-------|-------|----|------------------------------------------|---------|---|----------|
|         |       |       |    | R.SNMDNMFESYINNLR.R + Oxidation (M)      | 932.39  | 2 |          |
|         |       |       |    | R.SNMDNMFESYINNLR.R + Oxidation (M)      | 932.44  | 2 |          |
|         |       |       |    | R.ELQSQISDTSVVLSMDNSR.S                  | 703.18  | 3 |          |
|         |       |       |    | R.ELQSQISDTSVVLSMDNSR.S                  | 1054.94 | 2 |          |
| Spot 15 | K2C8  | 53671 | 8  | R.SLDMDSIIAEVK.A + Oxidation (M)         | 668.79  | 2 | ESI-TRAP |
|         |       |       |    | R.ASLEAAIADAEQR.G                        | 672.84  | 2 |          |
|         |       |       |    | R.LEGLTDEINFLR.Q                         | 710.46  | 2 |          |
|         |       |       |    | K.LEAELGNMQGLVEDFK.N + Oxidation (M)     | 905.06  | 2 |          |
|         |       |       |    | R.SNMDNMFESYINNLR.R + 2 Oxidation (M)    | 627.26  | 3 |          |
|         |       |       |    | R.SNMDNMFESYINNLR.R + 2 Oxidation (M)    | 940.65  | 2 |          |
|         |       |       |    | R.ELQSQISDTSVVLSMDNSR.S + Oxidation (M)  | 1062.86 | 2 |          |
|         |       |       |    | R.ELQSQISDTSVVLSMDNSR.S + Oxidation (M)  | 709.24  | 3 |          |
| Spot 16 | ANXA3 | 36375 | 5  | K.GIGTDEFTLNR.I                          | 612.06  | 2 | ESI-TRAP |
|         |       |       |    | K.SDTSGDYEITLLK.I                        | 721.82  | 2 |          |
|         |       |       |    | K.SLGDDISSETSGDFR.K                      | 793.48  | 2 |          |
|         |       |       |    | K.GAGTNEDALIEILTTR.T                     | 837.57  | 2 |          |
|         |       |       |    | R.DYPDFSPSVDAEAIQK.A                     | 891.81  | 2 |          |
|         |       |       |    |                                          |         |   |          |
| Spot 17 | LDHB  | 36900 | 11 | K.LSGLPK.H                               | 614.76  | 1 | ESI-TRAP |
|         |       |       |    | R.VIGSGCNLDSAR.F                         | 624.68  | 2 |          |
|         |       |       |    | K.MVVESAYEVIK.L                          | 634.18  | 2 |          |
|         |       |       |    | K.MVVESAYEVIK.L + Oxidation (M)          | 642.32  | 2 |          |
|         |       |       |    | K.IVADKDYSVTANSK.I                       | 755.86  | 2 |          |
|         |       |       |    | K.SLADELALVDVLEDK.L                      | 815.42  | 2 |          |
|         |       |       |    | K.LIAPVAEEEEATVPNNK.I                    | 848.23  | 2 |          |
|         |       |       |    | K.SLADELALVDVLEDK.LK.G                   | 624.48  | 3 |          |
|         |       |       |    | K.GEMMDLQHGSFLQTPK.I + Oxidation (M)     | 650.04  | 3 |          |
|         |       |       |    | K.GEMMDLQHGSFLQTPK.I + 2 Oxidation (M)   | 655.17  | 3 |          |
|         |       |       |    | K.ITVVGVGQVGMACAISILGK.S + Oxidation (M) | 663.60  | 3 |          |



|         |                           |                             |           |                                                    |         |   |          |
|---------|---------------------------|-----------------------------|-----------|----------------------------------------------------|---------|---|----------|
| Spot 18 | ACTB /<br>ANXA1 /<br>ACTC | 41737 /<br>38714 /<br>42019 | 6 / 5 / 3 | K.IWHHTFYNELR.V                                    | 758.33  | 2 | ESI-TRAP |
|         |                           |                             |           | K.SYELPDGQVITIGNER.F                               | 896.06  | 2 |          |
|         |                           |                             |           | R.VAPEEHPVLLTEAPLNPK.A                             | 652.11  | 3 |          |
|         |                           |                             |           | K.DLYANTVLSGGTTMYPGIADR.M + Oxidation (M)          | 1116.01 | 2 |          |
|         |                           |                             |           | K.DLYANTVLSGGTTMYPGIADR.M + Oxidation (M)          | 744.55  | 3 |          |
|         |                           |                             |           | R.TTGIVMDSGDGVTHTVPIYEGYALPHAILR.L + Oxidation (M) | 1067.41 | 3 |          |
|         |                           |                             |           | /                                                  | /       | / |          |
|         |                           |                             |           | K.TPAQFDADEL.R.A                                   | 631.72  | 2 |          |
|         |                           |                             |           | K.GVDEATHIDILTK.R                                  | 694.40  | 2 |          |
|         |                           |                             |           | K.GLGTDEDTLIEILASR.T                               | 852.13  | 2 |          |
|         |                           |                             |           | R.SEDFGVNEDLADSDAR.A                               | 870.34  | 2 |          |
|         |                           |                             |           | K.GGPGSAVSPYPTFNPSSDVAALHK.A                       | 786.12  | 3 |          |
|         |                           |                             |           | /                                                  | /       | / |          |
|         |                           |                             |           | K.IWHHTFYNELR.V                                    | 758.33  | 2 |          |
| Spot 19 | ANXA2                     | 38808                       | 9         | K.ILTERGYSFVTTAER.E                                | 581.44  | 3 | ESI-TRAP |
|         |                           |                             |           | K.SYELPDGQVITIGNER.F                               | 896.06  | 2 |          |
|         |                           |                             |           | K.DIISDTSGDFR.K                                    | 613.78  | 2 |          |
|         |                           |                             |           | R.TNQELQEINR.V                                     | 622.8   | 2 |          |
|         |                           |                             |           | K.SLYYYIQQDTK.G                                    | 711.37  | 2 |          |
|         |                           |                             |           | K.SYSPYDMLESIR.K + Oxidation (M)                   | 738.36  | 2 |          |
|         |                           |                             |           | K.GVDEVTIVNILTNR.S                                 | 772.2   | 2 |          |
|         |                           |                             |           | K.GLGTDEDSLIEIICSR.T                               | 889.56  | 2 |          |
|         |                           |                             |           | R.AEDGSVIDYELIDQDAR.D                              | 954.93  | 2 |          |
| Spot 20 | VIME /<br>TBA1B           | 53676 /<br>50804            | 8 / 7     | R.RAEDGSVIDYELIDQDAR.D                             | 1033.06 | 2 | ESI-TRAP |
|         |                           |                             |           | R.RAEDGSVIDYELIDQDAR.D                             | 689.12  | 3 |          |
|         |                           |                             |           | R.LGDLYEEEMR.E + Oxidation (M)                     | 635.6   | 2 |          |
|         |                           |                             |           | K.MALDIEIATYR.K + Oxidation (M)                    | 656.1   | 2 |          |
|         |                           |                             |           | R.EEAENTLQSFR.Q                                    | 662.22  | 2 |          |

|         |       |        |   |                                       |         |   |          |
|---------|-------|--------|---|---------------------------------------|---------|---|----------|
|         |       |        |   | R.SLYASSPGGVYATR.S                    | 714.57  | 2 | ESI-TRAP |
|         |       |        |   | R.QVQSLTCEVDALK.G                     | 745.87  | 2 |          |
|         |       |        |   | R.KVESLQEEIAFLK.K                     | 767.33  | 2 |          |
|         |       |        |   | R.ISLPLPNFSSLNLR.E                    | 786     | 2 |          |
|         |       |        |   | R.ETNLDSLPLVDTHSK.R                   | 835.03  | 2 |          |
|         |       |        |   | /                                     | /       | / |          |
|         |       |        |   | R.LSVDYGK.K                           | 781.06  | 1 |          |
|         |       |        |   | K.YMACCLLYR.G + Oxidation (M)         | 633.1   | 2 |          |
|         |       |        |   | R.LISQIVSSITASLR.F                    | 744.69  | 2 |          |
|         |       |        |   | R.AVFVDLEPTVIDEVR.T                   | 851.52  | 2 |          |
|         |       |        |   | R.IHFPLATYAPVISAEEK.A                 | 878.65  | 2 |          |
|         |       |        |   | K.VGINYQPPTVVPGGDLAK.V                | 913.38  | 2 |          |
|         |       |        |   | K.TIGGGDDSFNTFFSETGAGK.H              | 1004.42 | 2 |          |
| Spot 21 | VINC  | 124292 | 9 | R.WIDNPTVDDR.G                        | 616.23  | 2 | ESI-TRAP |
|         |       |        |   | R.VMLVNSMNTVK.E + Oxidation (M)       | 625.53  | 2 |          |
|         |       |        |   | K.MTGLVDEAIDTK.S + Oxidation (M)      | 654.55  | 2 |          |
|         |       |        |   | K.QVATALQNLQTK.T                      | 657.65  | 2 |          |
|         |       |        |   | K.AQQVSQGLDVLTAK.V                    | 729.27  | 2 |          |
|         |       |        |   | R.DPSASPGDAGEQAIR.Q                   | 735.81  | 2 |          |
|         |       |        |   | R.GILSGTSDLLLTDFDEAEVR.K              | 679.06  | 3 |          |
|         |       |        |   | R.GILSGTSDLLLTDFDEAEVR.K              | 1018.51 | 2 |          |
|         |       |        |   | K.LLAVAATAPPDAPNREEVFDER.A            | 794.53  | 3 |          |
| Spot 22 | PRDX1 | 22324  | 5 | R.TIAQDYGVLK.A                        | 554.38  | 2 | ESI-TRAP |
|         |       |        |   | K.ATAVMPDGQFK.D + Oxidation (M)       | 590.86  | 2 |          |
|         |       |        |   | R.LVQAFQFTDK.H                        | 598.95  | 2 |          |
|         |       |        |   | R.QITVNDLPVGR.S                       | 606.49  | 2 |          |
|         |       |        |   | K.KQGGLGPMNIPLVSDPK.R + Oxidation (M) | 589.92  | 3 |          |
| Spot 23 | K2C6B | 60067  | 1 | K.YEELQITAGR.H                        | 590.60  | 2 | ESI-TRAP |

|         |       |       |    |                                      |         |   |              |
|---------|-------|-------|----|--------------------------------------|---------|---|--------------|
| Spot 24 | LMNA  | 74139 | 12 | R.LSPSPTSQR.S                        | 486.76  | 2 | ESI-QUAD-TOF |
|         |       |       |    | K.LLEGEER.L                          | 487.75  | 2 |              |
|         |       |       |    | R.LADALQELR.A                        | 514.79  | 2 |              |
|         |       |       |    | K.EAALSTALSEK.R                      | 560.30  | 2 |              |
|         |       |       |    | K.EDLQELNDR.L                        | 566.27  | 2 |              |
|         |       |       |    | R.ITESEEVVSR.E                       | 574.80  | 2 |              |
|         |       |       |    | K.AAYEAEELGDAR.K                     | 583.28  | 2 |              |
|         |       |       |    | R.TLEGELHDLR.G                       | 591.81  | 2 |              |
|         |       |       |    | R.VAVEEVDEEGK.F                      | 602.29  | 2 |              |
|         |       |       |    | R.SGAQASSTPLSPTR.I                   | 680.35  | 2 |              |
|         |       |       |    | R.IDSLSAQLSQLQK.Q                    | 715.90  | 2 |              |
|         |       |       |    | R.NSNLVGAAHEELQQSR.I                 | 584.96  | 3 |              |
| Spot 25 | COF1  | 18719 | 2  | K.LGGSAVISLEGKPL.-                   | 670.89  | 2 | ESI-QUAD-TOF |
|         |       |       |    | K.NIILEEGKEILVGDVGQTVDDPYATFVK.M     | 1021.54 | 3 |              |
| Spot 26 | MOES  | 67820 | 5  | K.ESPLLFK.F                          | 417.25  | 2 | ESI-QUAD-TOF |
|         |       |       |    | K.APDFVFYAPR.L                       | 591.81  | 2 |              |
|         |       |       |    | R.EVWFFGLQYQDTK.G                    | 830.92  | 2 |              |
|         |       |       |    | K.KTQEQLALEMAELTAR.I + Oxidation (M) | 616.66  | 3 |              |
|         |       |       |    | K.IAQDLEMYGVNYFSIK.N + Oxidation (M) | 953.98  | 2 |              |
| Spot 27 | HS90A | 85006 | 8  | K.DQVANSADFVER.L                     | 618.24  | 2 | ESI-TRAP     |
|         |       |       |    | K.ADLINNLGTIAK.S                     | 622.13  | 2 |              |
|         |       |       |    | R.ELISNSSDALDK.I                     | 645.99  | 2 |              |
|         |       |       |    | K.EDQTEYLEER.R                       | 656.13  | 2 |              |
|         |       |       |    | K.EGLELPEDEEEK.K                     | 708.62  | 2 |              |
|         |       |       |    | R.GVVDSEDLPLNISR.E                   | 757.3   | 2 |              |
|         |       |       |    | R.NPDDITNEEYGEFYK.S                  | 917.41  | 2 |              |

|         |       |       |    |                                     |         |   |          |
|---------|-------|-------|----|-------------------------------------|---------|---|----------|
| Spot 28 | ANXA5 | 35971 | 11 | K.TKPIWTRNPDDITNEEYGEFYK.S          | 905.75  | 3 | ESI-TRAP |
|         |       |       |    | R.TPEELR.A                          | 744.21  | 1 |          |
|         |       |       |    | R.ADAETLR.K                         | 775.32  | 1 |          |
|         |       |       |    | R.QEISAAFK.T                        | 893.51  | 1 |          |
|         |       |       |    | K.NFATSLYSMIK.G                     | 637.72  | 2 |          |
|         |       |       |    | K.NFATSLYSMIK.G + Oxidation (M)     | 645.25  | 2 |          |
|         |       |       |    | R.GTVTDFPGFDER.A                    | 671     | 2 |          |
|         |       |       |    | K.GLGTDEESILTLLTSR.S                | 853.11  | 2 |          |
|         |       |       |    | R.SIPAYLAETLYYAMK.G + Oxidation (M) | 875.41  | 2 |          |
|         |       |       |    | K.YMTISGFQIEETIDR.E + Oxidation (M) | 910.05  | 2 |          |
|         |       |       |    | R.DPDAGIDEAQVEQDAQALFQAGELK.W       | 1329.61 | 2 |          |
|         |       |       |    | R.DPDAGIDEAQVEQDAQALFQAGELK.W       | 886.81  | 3 |          |

| <b>Supplementary Table 4. Biological process and molecular function of differentially expressed proteins</b> |                                                                                                                                                                                                                                                                                                    |                                                                                                                                                                                                                                                                           |
|--------------------------------------------------------------------------------------------------------------|----------------------------------------------------------------------------------------------------------------------------------------------------------------------------------------------------------------------------------------------------------------------------------------------------|---------------------------------------------------------------------------------------------------------------------------------------------------------------------------------------------------------------------------------------------------------------------------|
| Swiss Prot Accession No                                                                                      | Biological process                                                                                                                                                                                                                                                                                 | Molecular function                                                                                                                                                                                                                                                        |
| O00299                                                                                                       | Ion transport, transport                                                                                                                                                                                                                                                                           | Chloride channel, ionic channel, voltage-gated channel                                                                                                                                                                                                                    |
| P08727                                                                                                       | Involved in the organization of myofibers.                                                                                                                                                                                                                                                         | Structural constituent of cytoskeleton                                                                                                                                                                                                                                    |
| P05783                                                                                                       | Cell cycle, host-virus interaction                                                                                                                                                                                                                                                                 | Structural molecule activity                                                                                                                                                                                                                                              |
| P52566                                                                                                       | Regulates the GDP/GTP exchange reaction of the Rho proteins by inhibiting the dissociation of GDP from them, and the subsequent binding of GTP to them.                                                                                                                                            | GTPase activator activity, Rho GDP-dissociation inhibitor activity                                                                                                                                                                                                        |
| P30153                                                                                                       | Chromosome partition                                                                                                                                                                                                                                                                               | Antigen binding, protein phosphatase type 2A regulator activity, protein serine/threonine phosphatase activity                                                                                                                                                            |
| P10809                                                                                                       | Implicated in mitochondrial protein import and macromolecular assembly. May facilitate the correct folding of imported proteins. May also prevent misfolding and promote the refolding and proper assembly of unfolded polypeptides generated under stress conditions in the mitochondrial matrix. | ATP binding, ATPase activity, DNA replication origin binding, cell surface binding, lipopolysaccharide binding, single-stranded DNA binding                                                                                                                               |
| P38646 / P08133                                                                                              | Implicated in the control of cell proliferation and cellular aging. May also act as a chaperone / calcium ion transport, regulation of muscle contraction                                                                                                                                          | ATP binding / calcium ion binding, calcium-dependent phospholipid binding                                                                                                                                                                                                 |
| P13797                                                                                                       | Actin-bundling protein found in intestinal microvilli, hair cell stereocilia, and fibroblast filopodia.                                                                                                                                                                                            | Calcium ion binding                                                                                                                                                                                                                                                       |
| P06733                                                                                                       | Glycolysis, plasminogen activation, transcription, transcription regulation                                                                                                                                                                                                                        | DNA binding, magnesium ion binding, phosphopyruvate hydratase activity, sequence-specific DNA binding transcription factor activity, transcription corepressor activity                                                                                                   |
| P23528                                                                                                       | Rho protein signal transduction, actin cytoskeleton organization, anti-apoptosis, axon guidance, platelet activation, platelet degranulation, regulation of cell morphogenesis, response to virus                                                                                                  | Binds to F-actin and exhibits pH-sensitive F-actin depolymerizing activity. Regulates actin cytoskeleton dynamics. Important for normal progress through mitosis and normal cytokinesis. Plays a role in the regulation of cell morphology and cytoskeletal organization. |
| P10599                                                                                                       | Electron transport, transcription, transcription regulation,                                                                                                                                                                                                                                       | Electron carrier activity, peptide disulfide                                                                                                                                                                                                                              |

|                          |                                                                                                                                                                                                                                                                                                                                                                                                                                                                                                                                                                                                                                                                                                                                                                                                                                                                                                                                                                                                                                                                                                                                                                                                                                                             |                                                                                                                                                                                                                                                                                                                             |
|--------------------------|-------------------------------------------------------------------------------------------------------------------------------------------------------------------------------------------------------------------------------------------------------------------------------------------------------------------------------------------------------------------------------------------------------------------------------------------------------------------------------------------------------------------------------------------------------------------------------------------------------------------------------------------------------------------------------------------------------------------------------------------------------------------------------------------------------------------------------------------------------------------------------------------------------------------------------------------------------------------------------------------------------------------------------------------------------------------------------------------------------------------------------------------------------------------------------------------------------------------------------------------------------------|-----------------------------------------------------------------------------------------------------------------------------------------------------------------------------------------------------------------------------------------------------------------------------------------------------------------------------|
|                          | transport                                                                                                                                                                                                                                                                                                                                                                                                                                                                                                                                                                                                                                                                                                                                                                                                                                                                                                                                                                                                                                                                                                                                                                                                                                                   | oxidoreductase activity, protein disulfide oxidoreductase activity                                                                                                                                                                                                                                                          |
| P08729                   | Host-virus interaction, cytoskeleton organization                                                                                                                                                                                                                                                                                                                                                                                                                                                                                                                                                                                                                                                                                                                                                                                                                                                                                                                                                                                                                                                                                                                                                                                                           | Structural molecule activity                                                                                                                                                                                                                                                                                                |
| P05787                   | Host-virus interaction, cytoskeleton organization                                                                                                                                                                                                                                                                                                                                                                                                                                                                                                                                                                                                                                                                                                                                                                                                                                                                                                                                                                                                                                                                                                                                                                                                           | Structural molecule activity                                                                                                                                                                                                                                                                                                |
| P12429                   | Defense response to bacterium, hippocampus development, neutrophil degranulation, organ regeneration, phagocytosis, positive regulation of DNA metabolic process, positive regulation of angiogenesis, positive regulation of endothelial cell migration, positive regulation of sequence-specific DNA binding transcription factor activity, response to glucocorticoid stimulus, response to growth factor stimulus                                                                                                                                                                                                                                                                                                                                                                                                                                                                                                                                                                                                                                                                                                                                                                                                                                       | Calcium ion binding, calcium-dependent phospholipid binding, phospholipase A2 inhibitor activity                                                                                                                                                                                                                            |
| P07195                   | Glycolysis                                                                                                                                                                                                                                                                                                                                                                                                                                                                                                                                                                                                                                                                                                                                                                                                                                                                                                                                                                                                                                                                                                                                                                                                                                                  | L-lactate dehydrogenase activity, NAD binding                                                                                                                                                                                                                                                                               |
| P60709 / P04083 / P68032 | 'de novo' posttranslational protein folding, adherens junction organization, axon guidance, blood coagulation, cell junction assembly, cellular component movement, response to calcium ion<br>/<br>alpha-beta T cell differentiation, anti-apoptosis, arachidonic acid secretion, cell cycle, cell surface receptor signaling pathway, cellular component movement, cellular response to hydrogen peroxide, endocrine pancreas development, estrous cycle phase, gliogenesis, hepatocyte differentiation, inflammatory response, insulin secretion, keratinocyte differentiation, lipid metabolic process, negative regulation of acute inflammatory response, negative regulation of protein secretion, peptide cross-linking, positive regulation of apoptotic process, positive regulation of prostaglandin biosynthetic process, positive regulation of vesicle fusion, regulation of cell proliferation, response to X-ray, response to drug, response to estradiol stimulus, response to glucocorticoid stimulus, response to interleukin-1, response to organic cyclic compound, response to peptide hormone stimulus<br>/<br>apoptotic process, cardiac muscle contraction, cardiac muscle tissue morphogenesis, cardiac myofibril assembly, heart | ATP binding, structural constituent of cytoskeleton<br>/<br>calcium ion binding, calcium-dependent phospholipid binding, phospholipase A2 inhibitor activity, phospholipase inhibitor activity, single-stranded DNA binding, single-stranded RNA binding, structural molecule activity<br>/<br>ATP binding, ATPase activity |

|                 |                                                                                                                                                                                                                                                                                                                                                                                                                                                                                                                                                                        |                                                                                                                                                   |
|-----------------|------------------------------------------------------------------------------------------------------------------------------------------------------------------------------------------------------------------------------------------------------------------------------------------------------------------------------------------------------------------------------------------------------------------------------------------------------------------------------------------------------------------------------------------------------------------------|---------------------------------------------------------------------------------------------------------------------------------------------------|
|                 | contraction, muscle filament sliding, response to drug, response to ethanol, skeletal muscle thin filament assembly                                                                                                                                                                                                                                                                                                                                                                                                                                                    |                                                                                                                                                   |
| P07355          | Angiogenesis, body fluid secretion, cellular response to acid, collagen fibril organization, fibrinolysis, positive regulation of binding, positive regulation of vesicle fusion, skeletal system development                                                                                                                                                                                                                                                                                                                                                          | Calcium ion binding, calcium-dependent phospholipid binding, phosphatidylinositol-4,5-bisphosphate binding, phospholipase inhibitor activity      |
| P08670 / P68363 | Cellular component disassembly involved in apoptotic process, interspecies interaction between organisms, muscle filament sliding<br>/<br>'de novo' posttranslational protein folding, cell division, cytoskeleton-dependent intracellular transport, microtubule cytoskeleton organization, microtubule-based movement, microtubule-based process, protein polymerization                                                                                                                                                                                             | Structural constituent of cytoskeleton<br>/<br>GTP binding, GTPase activity, structural constituent of cytoskeleton, structural molecule activity |
| P18206          | Cell adhesion                                                                                                                                                                                                                                                                                                                                                                                                                                                                                                                                                          | Structural molecule activity                                                                                                                      |
| Q06830          | Cell proliferation, hydrogen peroxide catabolic process, skeletal system development                                                                                                                                                                                                                                                                                                                                                                                                                                                                                   | Thioredoxin peroxidase activity                                                                                                                   |
| P04259          | Intermediate filament<br>Keratin                                                                                                                                                                                                                                                                                                                                                                                                                                                                                                                                       | Structural constituent of cytoskeleton                                                                                                            |
| P02545          | Activation of signaling protein activity involved in unfolded protein response, cellular component disassembly involved in apoptotic process, cellular response to hypoxia, establishment or maintenance of microtubule cytoskeleton polarity, muscle organ development, nuclear envelope organization, positive regulation of cell aging, protein localization to nucleus, regulation of apoptotic process, regulation of cell migration, spermatogenesis, sterol regulatory element binding protein import into nucleus, ventricular cardiac muscle cell development | Structural molecule activity                                                                                                                      |
| P26038          | Leukocyte cell-cell adhesion, leukocyte migration, membrane to membrane docking, regulation of lymphocyte migration                                                                                                                                                                                                                                                                                                                                                                                                                                                    | Structural constituent of cytoskeleton                                                                                                            |
| P07900          | Stress response                                                                                                                                                                                                                                                                                                                                                                                                                                                                                                                                                        | ATP binding, ATPase activity, nitric-oxide synthase regulator activity                                                                            |
| P08758          | Blood coagulation<br>Hemostasis                                                                                                                                                                                                                                                                                                                                                                                                                                                                                                                                        | Calcium ion binding, calcium-dependent phospholipid binding, eukaryotic cell surface                                                              |

|                                                                                                          |
|----------------------------------------------------------------------------------------------------------|
| binding, phospholipase inhibitor activity                                                                |
| Information present in this table are from <a href="http://www.uniprot.org/">http://www.uniprot.org/</a> |



Table 5: Spearman correlation matrix

|                  | TBA1B/VIME | CLIC1  | K1C19  | K1C18  | GDIR2  | 2AAA   | RP75/ANXA | CH60   | PLST   | ENOA   | COF1   | THIO   | K2C7   | K2C8_1 | K2C8_2 | K2C8_3 | ANXA3  | LDHB   | ACTB/ ANXA1/ACTC | ANXA2  | VINC   | PRDX1  | K2C6B  | LMNA   | COF1_2 | MOES   | HS90A  | ANXA5  |
|------------------|------------|--------|--------|--------|--------|--------|-----------|--------|--------|--------|--------|--------|--------|--------|--------|--------|--------|--------|------------------|--------|--------|--------|--------|--------|--------|--------|--------|--------|
| TBA1B/VIME       | 1.000      | 0.986  | -0.812 | -0.600 | 0.943  | 0.943  | 0.600     | -0.600 | 0.928  | 0.899  | -0.829 | 0.706  | 0.829  | -0.714 | -0.771 | -0.600 | 0.943  | 0.833  | 0.941            | 0.580  | 0.829  | -0.829 | 0.880  | 0.714  | 0.829  | 0.794  | 0.580  | 0.600  |
| CLIC1            | 0.986      | 1.000  | -0.794 | -0.667 | 0.986  | 0.986  | 0.580     | -0.580 | 0.971  | 0.956  | -0.812 | 0.717  | 0.812  | -0.754 | -0.812 | -0.580 | 0.986  | 0.845  | 0.955            | 0.588  | 0.812  | -0.812 | 0.924  | 0.754  | 0.812  | 0.806  | 0.618  | 0.667  |
| K1C19            | -0.812     | -0.794 | 1.000  | 0.638  | -0.754 | -0.754 | -0.812    | 0.812  | -0.765 | -0.794 | 0.986  | -0.940 | -0.986 | 0.580  | 0.580  | 0.812  | -0.754 | -0.892 | -0.924           | -0.794 | -0.986 | 0.986  | -0.708 | -0.580 | -0.986 | -0.627 | -0.765 | -0.638 |
| K1C18            | -0.600     | -0.667 | 0.638  | 1.000  | -0.714 | -0.714 | -0.829    | 0.829  | -0.754 | -0.754 | 0.600  | -0.794 | -0.600 | 0.943  | 0.886  | 0.829  | -0.714 | -0.833 | -0.698           | -0.899 | -0.600 | 0.600  | -0.880 | -0.943 | -0.600 | -0.883 | -0.928 | -1.000 |
| GDIR2            | 0.943      | 0.986  | -0.754 | -0.714 | 1.000  | 1.000  | 0.543     | -0.543 | 0.986  | 0.986  | -0.771 | 0.706  | 0.771  | -0.771 | -0.829 | -0.543 | 1.000  | 0.833  | 0.941            | 0.580  | 0.771  | -0.771 | 0.941  | 0.771  | 0.771  | 0.794  | 0.638  | 0.714  |
| 2AAA             | 0.943      | 0.986  | -0.754 | -0.714 | 1.000  | 1.000  | 0.543     | -0.543 | 0.986  | 0.986  | -0.771 | 0.706  | 0.771  | -0.771 | -0.829 | -0.543 | 1.000  | 0.833  | 0.941            | 0.580  | 0.771  | -0.771 | 0.941  | 0.771  | 0.771  | 0.794  | 0.638  | 0.714  |
| GRP75/ANXA6      | 0.600      | 0.580  | -0.812 | -0.829 | 0.543  | 0.543  | 1.000     | -1.000 | 0.580  | 0.580  | -0.771 | 0.883  | 0.771  | -0.771 | -0.714 | -1.000 | 0.543  | 0.833  | 0.698            | 0.986  | 0.771  | -0.771 | 0.698  | 0.771  | 0.771  | 0.794  | 0.928  | 0.829  |
| CH60             | -0.600     | -0.580 | 0.812  | 0.829  | -0.543 | -0.543 | -1.000    | 1.000  | -0.580 | -0.580 | 0.771  | -0.883 | -0.771 | 0.771  | 0.714  | 1.000  | -0.543 | -0.833 | -0.698           | -0.986 | -0.771 | 0.771  | -0.698 | -0.771 | -0.771 | -0.794 | -0.928 | -0.829 |
| PLST             | 0.928      | 0.971  | -0.765 | -0.754 | 0.986  | 0.986  | 0.580     | -0.580 | 1.000  | 0.971  | -0.754 | 0.761  | 0.754  | -0.812 | -0.812 | -0.580 | 0.986  | 0.892  | 0.924            | 0.618  | 0.754  | -0.754 | 0.955  | 0.812  | 0.754  | 0.806  | 0.647  | 0.754  |
| ENOA             | 0.899      | 0.956  | -0.794 | -0.754 | 0.986  | 0.986  | 0.580     | -0.580 | 0.971  | 1.000  | -0.812 | 0.761  | 0.812  | -0.754 | -0.812 | -0.580 | 0.986  | 0.845  | 0.955            | 0.632  | 0.812  | -0.812 | 0.924  | 0.754  | 0.812  | 0.761  | 0.706  | 0.754  |
| COF1             | -0.829     | -0.812 | 0.986  | 0.600  | -0.771 | -0.771 | -0.771    | 0.771  | -0.754 | -0.812 | 1.000  | -0.883 | -1.000 | 0.543  | 0.600  | 0.771  | -0.771 | -0.833 | -0.941           | -0.754 | -1.000 | 1.000  | -0.698 | -0.543 | -1.000 | -0.618 | -0.754 | -0.600 |
| THIO             | 0.706      | 0.717  | -0.940 | -0.794 | 0.706  | 0.706  | 0.883     | -0.883 | 0.761  | 0.761  | -0.883 | 1.000  | 0.883  | -0.706 | -0.618 | -0.883 | 0.706  | 0.953  | 0.844            | 0.896  | 0.883  | -0.883 | 0.750  | 0.706  | 0.883  | 0.682  | 0.851  | 0.794  |
| K2C7             | 0.829      | 0.812  | -0.986 | -0.600 | 0.771  | 0.771  | 0.771     | -0.771 | 0.754  | 0.812  | -1.000 | 0.883  | 1.000  | -0.543 | -0.600 | -0.771 | 0.771  | 0.833  | 0.941            | 0.754  | 1.000  | -1.000 | 0.698  | 0.543  | 1.000  | 0.618  | 0.754  | 0.600  |
| K2C8_1           | -0.714     | -0.754 | 0.580  | 0.943  | -0.771 | -0.771 | -0.771    | 0.771  | -0.812 | -0.754 | 0.543  | -0.706 | -0.543 | 1.000  | 0.943  | 0.771  | -0.771 | -0.833 | -0.698           | -0.812 | -0.543 | 0.543  | -0.941 | -1.000 | -0.543 | -0.971 | -0.812 | -0.943 |
| K2C8_2           | -0.771     | -0.812 | 0.580  | 0.886  | -0.829 | -0.829 | -0.714    | 0.714  | -0.812 | -0.812 | 0.600  | -0.618 | -0.600 | 0.943  | 1.000  | 0.714  | -0.829 | -0.741 | -0.759           | -0.754 | -0.600 | 0.600  | -0.941 | -0.943 | -0.600 | -0.971 | -0.812 | -0.886 |
| K2C8_3           | -0.600     | -0.580 | 0.812  | 0.829  | -0.543 | -0.543 | -1.000    | 1.000  | -0.580 | -0.580 | 0.771  | -0.883 | -0.771 | 0.771  | 0.714  | 1.000  | -0.543 | -0.833 | -0.698           | -0.986 | -0.771 | 0.771  | -0.698 | -0.771 | -0.771 | -0.794 | -0.928 | -0.829 |
| ANXA3            | 0.943      | 0.986  | -0.754 | -0.714 | 1.000  | 1.000  | 0.543     | -0.543 | 0.986  | 0.986  | -0.771 | 0.706  | 0.771  | -0.771 | -0.829 | -0.543 | 1.000  | 0.833  | 0.941            | 0.580  | 0.771  | -0.771 | 0.941  | 0.771  | 0.771  | 0.794  | 0.638  | 0.714  |
| LDHB             | 0.833      | 0.845  | -0.892 | -0.833 | 0.833  | 0.833  | 0.833     | -0.833 | 0.892  | 0.845  | -0.833 | 0.953  | 0.833  | -0.833 | -0.741 | -0.833 | 0.833  | 1.000  | 0.885            | 0.845  | 0.833  | -0.833 | 0.885  | 0.833  | 0.833  | 0.810  | 0.798  | 0.833  |
| ACTB/ ANXA1/ACTC | 0.941      | 0.955  | -0.924 | -0.698 | 0.941  | 0.941  | 0.698     | -0.698 | 0.924  | 0.955  | -0.941 | 0.844  | 0.941  | -0.698 | -0.759 | -0.698 | 0.941  | 0.885  | 1.000            | 0.708  | 0.941  | -0.941 | 0.871  | 0.698  | 0.941  | 0.750  | 0.739  | 0.698  |
| ANXA2            | 0.580      | 0.588  | -0.794 | -0.899 | 0.580  | 0.580  | 0.986     | -0.986 | 0.618  | 0.632  | -0.754 | 0.896  | 0.754  | -0.812 | -0.754 | -0.986 | 0.580  | 0.845  | 0.708            | 1.000  | 0.754  | -0.754 | 0.739  | 0.812  | 0.754  | 0.806  | 0.971  | 0.899  |
| VINC             | 0.829      | 0.812  | -0.986 | -0.600 | 0.771  | 0.771  | 0.771     | -0.771 | 0.754  | 0.812  | -1.000 | 0.883  | 1.000  | -0.543 | -0.600 | -0.771 | 0.771  | 0.833  | 0.941            | 0.754  | 1.000  | -1.000 | 0.698  | 0.543  | 1.000  | 0.618  | 0.754  | 0.600  |
| PRDX1            | -0.829     | -0.812 | 0.986  | 0.600  | -0.771 | -0.771 | -0.771    | 0.771  | -0.754 | -0.812 | 1.000  | -0.883 | -1.000 | 0.543  | 0.600  | 0.771  | -0.771 | -0.833 | -0.941           | -0.754 | -1.000 | 1.000  | -0.698 | -0.543 | -1.000 | -0.618 | -0.754 | -0.600 |
| K2C6B            | 0.880      | 0.924  | -0.708 | -0.880 | 0.941  | 0.941  | 0.698     | -0.698 | 0.955  | 0.924  | -0.698 | 0.750  | 0.698  | -0.941 | -0.941 | -0.698 | 0.941  | 0.885  | 0.871            | 0.739  | 0.698  | -0.698 | 1.000  | 0.941  | 0.698  | 0.938  | 0.770  | 0.880  |
| LMNA             | 0.714      | 0.754  | -0.580 | -0.943 | 0.771  | 0.771  | 0.771     | -0.771 | 0.812  | 0.754  | -0.543 | 0.706  | 0.543  | -1.000 | -0.943 | -0.771 | 0.771  | 0.833  | 0.698            | 0.812  | 0.543  | -0.543 | 0.941  | 1.000  | 0.543  | 0.971  | 0.812  | 0.943  |
| COF1_2           | 0.829      | 0.812  | -0.986 | -0.600 | 0.771  | 0.771  | 0.771     | -0.771 | 0.754  | 0.812  | -1.000 | 0.883  | 1.000  | -0.543 | -0.600 | -0.771 | 0.771  | 0.833  | 0.941            | 0.754  | 1.000  | -1.000 | 0.698  | 0.543  | 1.000  | 0.618  | 0.754  | 0.600  |
| MOES             | 0.794      | 0.806  | -0.627 | -0.883 | 0.794  | 0.794  | 0.794     | -0.794 | 0.806  | 0.761  | -0.618 | 0.682  | 0.618  | -0.971 | -0.971 | -0.794 | 0.794  | 0.810  | 0.750            | 0.806  | 0.618  | -0.618 | 0.938  | 0.971  | 0.618  | 1.000  | 0.806  | 0.883  |
| HS90A            | 0.580      | 0.618  | -0.765 | -0.928 | 0.638  | 0.638  | 0.928     | -0.928 | 0.647  | 0.706  | -0.754 | 0.851  | 0.754  | -0.812 | -0.812 | -0.928 | 0.638  | 0.798  | 0.739            | 0.971  | 0.754  | -0.754 | 0.770  | 0.812  | 0.754  | 0.806  | 1.000  | 0.928  |
| ANXA5            | 0.600      | 0.667  | -0.638 | -1.000 | 0.714  | 0.714  | 0.829     | -0.829 | 0.754  | 0.754  | -0.600 | 0.794  | 0.600  | -0.943 | -0.886 | -0.829 | 0.714  | 0.833  | 0.698            | 0.899  | 0.600  | -0.600 | 0.880  | 0.943  | 0.600  | 0.883  | 0.928  | 1.000  |

Table 6A

PCA Cross-Validation statistics

| Principal Component | R <sup>2</sup> X | R <sup>2</sup> X(cum) | Eigenvalue | Q <sup>2</sup> | limit  | Q2(cum) |
|---------------------|------------------|-----------------------|------------|----------------|--------|---------|
| 1                   | 0.9380           | 0.9380                | 5.6300     | 0.9030         | 0.1950 | 0.9030  |
| 2                   | 0.0387           | 0.9770                | 0.2320     | 0.4560         | 0.2290 | 0.9470  |

PCA Cross-validation statistics for the MCF7 vs MDA-MD-231 comparison. A two component model use 97.77% of X for predicting 94.70% of the response variation.

R<sup>2</sup>X: fraction of the variation of descriptor matrix (X) explained by each Principal component (PC); R<sup>2</sup>X(cum)  
Cumulative explained fraction of the variation of the X block; Eigenvalue: The number of variables (K) times R<sup>2</sup>X; Q<sup>2</sup>:  
Overall cross-validated R<sup>2</sup>X for the component; Q<sup>2</sup>(cum): The cumulative Q<sup>2</sup> for the extracted components; Limit:  
The cross validation threshold for that component.

Table 6B

PLS-DA Cross-Validation statistics

| Principal Component | R <sup>2</sup> X | R <sup>2</sup> X(cum) | Eigenvalue | R <sup>2</sup> Y | R <sup>2</sup> Y(cum) | Q <sup>2</sup> | limit | Q <sup>2</sup> (cum) |
|---------------------|------------------|-----------------------|------------|------------------|-----------------------|----------------|-------|----------------------|
| 1                   | 0.9380           | 0.938                 | 5.630      | 0.9950           | 0.9950                | 0.9920         | 0.05  | 0.9920               |
| 2                   | 0.0385           | 0.976                 | 0.231      | 0.0049           | 1                     | 0.9000         | 0.05  | 0.9990               |

**PLS-DA Cross-validation statistics for the MCF7 vs MDA-MD-231 comparison.** A two component model use 97.6 % of X variation for modelling 100 % and predicting 99.90 % of the response variation.

**R<sup>2</sup>X**: fraction of the variation of descriptor matrix (X) explained by each Principal component (PC); **R<sup>2</sup>X(cum)** Cumulative explained fraction of the variation of the X block; **Eigenvalue**: The number of variables (K) times R<sup>2</sup>X; **R<sup>2</sup>Y** Fraction of the Y variation modeled in that component; **R<sup>2</sup>Y(cum)** Cumulative R<sup>2</sup>Y up to the specified component; **Q<sup>2</sup>**: Overall cross-validated R<sup>2</sup>X for the component; **Limit**: The cross validation threshold for that component; **Q<sup>2</sup>(cum)**: Cumulative Q<sup>2</sup> up to the specified component. Unlike R<sup>2</sup>X(cum), Q<sup>2</sup>(cum) is not additive

Supplementary Table 7

|         |                      |                                                                                                                                                                                                                                                                                                                                                                                                                                                                                                                                                                                                                          |
|---------|----------------------|--------------------------------------------------------------------------------------------------------------------------------------------------------------------------------------------------------------------------------------------------------------------------------------------------------------------------------------------------------------------------------------------------------------------------------------------------------------------------------------------------------------------------------------------------------------------------------------------------------------------------|
| FKBP4   | 9606.ENSP00000001008 | FK506 binding protein 4, 59kDa; Component of unactivated mammalian steroid receptor complexes that sediment at 8-10 S. May have a rotamase activity. May play a role in the intracellular trafficking of heterooligomeric forms of steroid hormone receptors                                                                                                                                                                                                                                                                                                                                                             |
| HSPA9   | 9606.ENSP00000297185 | heat shock 70kDa protein 9 (mortalin); Implicated in the control of cell proliferation and cellular aging. May also act as a chaperone                                                                                                                                                                                                                                                                                                                                                                                                                                                                                   |
| SSH1    | 9606.ENSP00000315713 | slingshot homolog 1 (Drosophila); Protein phosphatase which regulates actin filament dynamics. Dephosphorylates and activates the actin binding/depolymerizing factor cofilin, which subsequently binds to actin filaments and stimulates their disassembly. Inhibitory phosphorylation of cofilin is mediated by LIMK1, which may also be dephosphorylated and inactivated by this protein                                                                                                                                                                                                                              |
| PPP2R1A | 9606.ENSP00000324804 | protein phosphatase 2 (formerly 2A), regulatory subunit A, alpha isoform; The PR65 subunit of protein phosphatase 2A serves as a scaffolding molecule to coordinate the assembly of the catalytic subunit and a variable regulatory B subunit                                                                                                                                                                                                                                                                                                                                                                            |
| MYL2    | 9606.ENSP00000228841 | myosin, light chain 2, regulatory, cardiac, slow                                                                                                                                                                                                                                                                                                                                                                                                                                                                                                                                                                         |
| STIP1   | 9606.ENSP00000305958 | stress-induced-phosphoprotein 1; Mediates the association of the molecular chaperones HSC70 and HSP90 (HSPCA and HSPCB)                                                                                                                                                                                                                                                                                                                                                                                                                                                                                                  |
| MOBK13  | 9606.ENSP00000315702 | MOB1, Mps One Binder kinase activator-like 3 (yeast)                                                                                                                                                                                                                                                                                                                                                                                                                                                                                                                                                                     |
| S100B   | 9606.ENSP00000291700 | S100 calcium binding protein B; Weakly binds calcium but binds zinc very tightly-distinct binding sites with different affinities exist for both ions on each monomer. Physiological concentrations of potassium ion antagonize the binding of both divalent cations, especially affecting high-affinity calcium-binding sites. Binds to and initiates the activation of STK38 by releasing autoinhibitory intramolecular interactions within the kinase                                                                                                                                                                 |
| CALD1   | 9606.ENSP00000354826 | caldesmon 1; Actin- and myosin-binding protein implicated in the regulation of actomyosin interactions in smooth muscle and nonmuscle cells (could act as a bridge between myosin and actin filaments). Stimulates actin binding of tropomyosin which increases the stabilization of actin filament structure. In muscle tissues, inhibits the actomyosin ATPase by binding to F-actin. This inhibition is attenuated by calcium-calmodulin and is potentiated by tropomyosin. Interacts with actin, myosin, two molecules of tropomyosin and with calmodulin. Also play an essential role during cellular mitosis [...] |
| MICAL1  | 9606.ENSP00000351664 | microtubule associated monooxygenase, calponin and LIM domain containing 1; May be a cytoskeletal regulator that connects NEDD9 to intermediate filaments                                                                                                                                                                                                                                                                                                                                                                                                                                                                |
| S100A9  | 9606.ENSP00000357727 | S100 calcium binding protein A9; Calcium-binding protein. Has antimicrobial activity towards bacteria and fungi. Important for resistance to invasion by pathogenic bacteria. Up-regulates transcription of genes that are under the control of NF-kappa-B. Plays a role in the development of endotoxic shock in response to bacterial lipopolysaccharide (LPS) (By similarity). Promotes tubulin polymerization when unphosphorylated. Promotes phagocyte migration and infiltration of granulocytes at sites of wounding. Plays a role as a pro-inflammatory mediator in acute and chronic inflammation and u [...]   |
| MYH7    | 9606.ENSP00000347507 | myosin, heavy chain 7, cardiac muscle, beta; Muscle contraction                                                                                                                                                                                                                                                                                                                                                                                                                                                                                                                                                          |
| LMNA    | 9606.ENSP00000357283 | lamin A/C; Lamins are components of the nuclear lamina, a fibrous layer on the nucleoplasmic side of the inner nuclear membrane, which is thought to provide a framework for the nuclear envelope and may also interact with chromatin. Lamin A and C are present in equal amounts in the lamina of mammals                                                                                                                                                                                                                                                                                                              |
| TLR4    | 9606.ENSP00000363089 | toll-like receptor 4; Cooperates with LY96 and CD14 to mediate the innate immune response to bacterial lipopolysaccharide (LPS). Acts via MYD88, TIRAP and TRAF6, leading to NF-kappa-B activation, cytokine secretion and the inflammatory response                                                                                                                                                                                                                                                                                                                                                                     |
| ZYX     | 9606.ENSP00000324422 | zyxin; Adhesion plaque protein. Binds alpha-actinin and the CRP protein. Important for targeting TES and ENA/VASP family members to focal adhesions and for the formation of actin-rich structures. May be a component of a signal transduction pathway that mediates adhesion-stimulated changes in gene expression (By similarity)                                                                                                                                                                                                                                                                                     |
| PPME1   | 9606.ENSP00000381461 | protein phosphatase methylesterase 1; Demethylates proteins that have been reversibly carboxymethylated. Demethylates PPP2CB (in vitro)                                                                                                                                                                                                                                                                                                                                                                                                                                                                                  |
| LMNB2   | 9606.ENSP00000327054 | lamin B2; Lamins are components of the nuclear lamina, a fibrous layer on the nucleoplasmic side of the inner nuclear membrane, which is thought to provide a framework for the nuclear envelope and may also interact with chromatin                                                                                                                                                                                                                                                                                                                                                                                    |

|        |                      |                                                                                                                                                                                                                                                                                                                                                                                                                                                                                                                                                                                                                          |
|--------|----------------------|--------------------------------------------------------------------------------------------------------------------------------------------------------------------------------------------------------------------------------------------------------------------------------------------------------------------------------------------------------------------------------------------------------------------------------------------------------------------------------------------------------------------------------------------------------------------------------------------------------------------------|
| SORBS1 | 9606.ENSPO0000355136 | sorbin and SH3 domain containing 1; Plays a role in tyrosine phosphorylation of CBL by linking CBL to the insulin receptor. Required for insulin- stimulated glucose transport. Involved in formation of actin stress fibers and focal adhesions (By similarity)                                                                                                                                                                                                                                                                                                                                                         |
| SLC9A1 | 9606.ENSPO0000263980 | solute carrier family 9 (sodium/hydrogen exchanger), member 1; Involved in pH regulation to eliminate acids generated by active metabolism or to counter adverse environmental conditions. Major proton extruding system driven by the inward sodium ion chemical gradient. Plays an important role in signal transduction                                                                                                                                                                                                                                                                                               |
| TXNIP  | 9606.ENSPO0000358323 | thioredoxin interacting protein; May act as an oxidative stress mediator by inhibiting thioredoxin activity or by limiting its bioavailability. Interacts with COPS5 and restores COPS5-induced suppression of CDKN1B stability, blocking the COPS5-mediated translocation of CDKN1B from the nucleus to the cytoplasm. Functions as a transcriptional repressor, possibly by acting as a bridge molecule between transcription factors and corepressor complexes, and over- expression will induce G0/G1 cell cycle arrest. Required for the maturation of natural killer cells                                         |
| GAPDH  | 9606.ENSPO0000229239 | glyceraldehyde-3-phosphate dehydrogenase; Independent of its glycolytic activity it is also involved in membrane trafficking in the early secretory pathway                                                                                                                                                                                                                                                                                                                                                                                                                                                              |
| PPFIA1 | 9606.ENSPO0000253925 | protein tyrosine phosphatase, receptor type, f polypeptide (PTPRF), interacting protein (liprin), alpha 1; May regulate the disassembly of focal adhesions. May localize receptor-like tyrosine phosphatases type 2A at specific sites on the plasma membrane, possibly regulating their interaction with the extracellular environment and their association with substrates                                                                                                                                                                                                                                            |
| ACTN1  | 9606.ENSPO0000377941 | actinin, alpha 1; F-actin cross-linking protein which is thought to anchor actin to a variety of intracellular structures. This is a bundling protein                                                                                                                                                                                                                                                                                                                                                                                                                                                                    |
| PKP1   | 9606.ENSPO0000263946 | plakophilin 1 (ectodermal dysplasia/skin fragility syndrome); Seems to play a role in junctional plaques. Contributes to epidermal morphogenesis                                                                                                                                                                                                                                                                                                                                                                                                                                                                         |
| CFL1   | 9606.ENSPO0000309629 | cofilin 1 (non-muscle); Controls reversibly actin polymerization and depolymerization in a pH-sensitive manner. It has the ability to bind G- and F-actin in a 1:1 ratio of cofilin to actin. It is the major component of intranuclear and cytoplasmic actin rods                                                                                                                                                                                                                                                                                                                                                       |
| PTGES3 | 9606.ENSPO0000262033 | prostaglandin E synthase 3 (cytosolic); Molecular chaperone that localizes to genomic response elements in a hormone-dependent manner and disrupts receptor- mediated transcriptional activation, by promoting disassembly of transcriptional regulatory complexes                                                                                                                                                                                                                                                                                                                                                       |
| KRT6A  | 9606.ENSPO0000369317 | keratin 6A                                                                                                                                                                                                                                                                                                                                                                                                                                                                                                                                                                                                               |
| PKM2   | 9606.ENSPO0000320171 | pyruvate kinase, muscle; Glycolytic enzyme that catalyzes the transfer of a phosphoryl group from phosphoenolpyruvate (PEP) to ADP, generating ATP. Stimulates POU5F1-mediated transcriptional activation. Plays a general role in caspase independent cell death of tumor cells. The ratio between the highly active tetrameric form and nearly inactive dimeric form determines whether glucose carbons are channeled to biosynthetic processes or used for glycolytic ATP production. The transition between the 2 forms contributes to the control of glycolysis and is important for tumor cell proliferation [...] |
| HSPA8  | 9606.ENSPO0000227378 | heat shock 70kDa protein 8; Chaperone. Isoform 2 may function as an endogenous inhibitory regulator of HSC70 by competing the co-chaperones                                                                                                                                                                                                                                                                                                                                                                                                                                                                              |
| AURKB  | 9606.ENSPO0000313950 | aurora kinase B; May be directly involved in regulating the cleavage of polar spindle microtubules and is a key regulator for the onset of cytokinesis during mitosis. Component of the chromosomal passenger complex (CPC), a complex that acts as a key regulator of mitosis. The CPC complex has essential functions at the centromere in ensuring correct chromosome alignment and segregation and is required for chromatin-induced microtubule stabilization and spindle assembly. Phosphorylates 'Ser-10' and 'Ser-28' of histone H3 during mitosis                                                               |
| TXN    | 9606.ENSPO0000363641 | thioredoxin; Participates in various redox reactions through the reversible oxidation of its active center dithiol to a disulfide and catalyzes dithiol-disulfide exchange reactions. Plays a role in the reversible S-nitrosylation of cysteine residues in target proteins, and thereby contributes to the response to intracellular nitric oxide. Nitrosylates the active site Cys of CASP3 in response to nitric oxide (NO), and thereby inhibits caspase-3 activity                                                                                                                                                 |
| AHA2   | 9606.ENSPO0000349525 | AHA1, activator of heat shock 90kDa protein ATPase homolog 2 (yeast); Cochaperone that stimulates HSP90 ATPase activity (By similarity)                                                                                                                                                                                                                                                                                                                                                                                                                                                                                  |

|                 |                      |                                                                                                                                                                                                                                                                                                                                                                                                                                                                                                                                                                                                                        |
|-----------------|----------------------|------------------------------------------------------------------------------------------------------------------------------------------------------------------------------------------------------------------------------------------------------------------------------------------------------------------------------------------------------------------------------------------------------------------------------------------------------------------------------------------------------------------------------------------------------------------------------------------------------------------------|
| CYCS            | 9606.ENSPO0000307786 | cytochrome c, somatic; Electron carrier protein. The oxidized form of the cytochrome c heme group can accept an electron from the heme group of the cytochrome c1 subunit of cytochrome reductase. Cytochrome c then transfers this electron to the cytochrome oxidase complex, the final protein carrier in the mitochondrial electron-transport chain                                                                                                                                                                                                                                                                |
| PRDX1           | 9606.ENSPO0000262746 | peroxiredoxin 1; Involved in redox regulation of the cell. Reduces peroxides with reducing equivalents provided through the thioredoxin system but not from glutaredoxin. May play an important role in eliminating peroxides generated during metabolism. Might participate in the signaling cascades of growth factors and tumor necrosis factor-alpha by regulating the intracellular concentrations of H(2)O(2). Reduces an intramolecular disulfide bond in GDPD5 that gates the ability to GDPD5 to drive postmitotic motor neuron differentiation (By similarity)                                               |
| SGTA            | 9606.ENSPO0000221566 | small glutamine-rich tetratricopeptide repeat (TPR)-containing, alpha; Co-chaperone that binds directly to HSC70 and HSP70 and regulates their ATPase activity                                                                                                                                                                                                                                                                                                                                                                                                                                                         |
| NR3C1           | 9606.ENSPO0000231509 | nuclear receptor subfamily 3, group C, member 1 (glucocorticoid receptor); Receptor for glucocorticoids (GC). Has a dual mode of action: as a transcription factor that binds to glucocorticoid response elements (GRE) and as a modulator of other transcription factors. Affects inflammatory responses, cellular proliferation and differentiation in target tissues. Could act as a coactivator for STAT5-dependent transcription upon growth hormone (GH) stimulation and could reveal an essential role of hepatic GR in the control of body growth. Involved in chromatin remodeling. Plays a significant [...] |
| AIP             | 9606.ENSPO0000279146 | aryl hydrocarbon receptor interacting protein; May play a positive role in AHR-mediated (aromatic hydrocarbon receptor) signaling, possibly by influencing its receptivity for ligand and/or its nuclear targeting                                                                                                                                                                                                                                                                                                                                                                                                     |
| TXNRD1          | 9606.ENSPO0000412045 | thioredoxin reductase 1; Isoform 1 may possess glutaredoxin activity as well as thioredoxin reductase activity and induces actin and tubulin polymerization, leading to formation of cell membrane protrusions. Isoform 4 enhances the transcriptional activity of estrogen receptors alpha and beta while isoform 5 enhances the transcriptional activity of the beta receptor only. Isoform 5 also mediates cell death induced by a combination of interferon-beta and retinoic acid                                                                                                                                 |
| ENSG00000115541 | 9606.ENSPO0000398885 | Putative uncharacterized protein ENSPO0000398885 Fragment ; Eukaryotic CPN10 homolog which is essential for mitochondrial protein biogenesis, together with CPN60. Binds to CPN60 in the presence of Mg-ATP and suppresses the ATPase activity of the latter                                                                                                                                                                                                                                                                                                                                                           |
| PTK2            | 9606.ENSPO0000341189 | PTK2 protein tyrosine kinase 2; Non-receptor protein-tyrosine kinase implicated in signaling pathways involved in cell motility, proliferation and apoptosis. Activated by tyrosine-phosphorylation in response to either integrin clustering induced by cell adhesion or antibody cross-linking, or via G-protein coupled receptor (GPCR) occupancy by ligands such as bombesin or lysophosphatidic acid, or via LDL receptor occupancy. Plays a potential role in oncogenic transformations resulting in increased kinase activity                                                                                   |
| CD93            | 9606.ENSPO0000246006 | CD93 molecule; Receptor (or element of a larger receptor complex) for C1q, mannose-binding lectin (MBL2) and pulmonary surfactant protein A (SPA). May mediate the enhancement of phagocytosis in monocytes and macrophages upon interaction with soluble defense collagens. May play a role in intercellular adhesion                                                                                                                                                                                                                                                                                                 |
| CTNND1          | 9606.ENSPO0000382004 | catenin (cadherin-associated protein), delta 1; Binds to and inhibits the transcriptional repressor ZBTB33, which may lead to activation of target genes of the Wnt signaling pathway (By similarity). May associate with and regulate the cell adhesion properties of both C- and E-cadherins. Implicated both in cell transformation by SRC and in ligand-induced receptor signaling through the EGF, PDGF, CSF-1 and ERBB2 receptors. Promotes GLIS2 C-terminal cleavage                                                                                                                                            |
| AR              | 9606.ENSPO0000363822 | androgen receptor; Steroid hormone receptors are ligand-activated transcription factors that regulate eukaryotic gene expression and affect cellular proliferation and differentiation in target tissues. Transcription factor activity is modulated by bound coactivator and corepressor proteins. Transcription activation is down-regulated by NR0B2. Activated, but not phosphorylated, by HIPK3                                                                                                                                                                                                                   |
| LMNB1           | 9606.ENSPO0000261366 | lamin B1; Lamins are components of the nuclear lamina, a fibrous layer on the nucleoplasmic side of the inner nuclear membrane, which is thought to provide a framework for the nuclear envelope and may also interact with chromatin                                                                                                                                                                                                                                                                                                                                                                                  |
| FLG             | 9606.ENSPO0000357789 | filaggrin; Aggregates keratin intermediate filaments and promotes disulfide-bond formation among the intermediate filaments during terminal differentiation of mammalian epidermis                                                                                                                                                                                                                                                                                                                                                                                                                                     |

|         |                      |                                                                                                                                                                                                                                                                                                                                                                                                                                                                                                                                                                                                                        |
|---------|----------------------|------------------------------------------------------------------------------------------------------------------------------------------------------------------------------------------------------------------------------------------------------------------------------------------------------------------------------------------------------------------------------------------------------------------------------------------------------------------------------------------------------------------------------------------------------------------------------------------------------------------------|
| KRT6C   | 9606.ENSP00000252250 | keratin 6C                                                                                                                                                                                                                                                                                                                                                                                                                                                                                                                                                                                                             |
| PPP2R5D | 9606.ENSP00000417963 | protein phosphatase 2, regulatory subunit B', delta isoform; The B regulatory subunit might modulate substrate selectivity and catalytic activity, and also might direct the localization of the catalytic enzyme to a particular subcellular compartment                                                                                                                                                                                                                                                                                                                                                              |
| RAVER1  | 9606.ENSP00000293677 | ribonucleoprotein, PTB-binding 1; Cooperates with PTBP1 to modulate regulated alternative splicing events. Promotes exon skipping. Cooperates with PTBP1 to modulate switching between mutually exclusive exons during maturation of the TPM1 pre-mRNA (By similarity)                                                                                                                                                                                                                                                                                                                                                 |
| FKBP1A  | 9606.ENSP00000371138 | FK506 binding protein 1A, 12kDa; May play a role in modulation of ryanodine receptor isoform-1 (RyR-1), a component of the calcium release channel of skeletal muscle sarcoplasmic reticulum. There are four molecules of FKBP12 per skeletal muscle RyR. PPIases accelerate the folding of proteins. It catalyzes the cis-trans isomerization of proline imidic peptide bonds in oligopeptides                                                                                                                                                                                                                        |
| STRN3   | 9606.ENSP00000350071 | striatin, calmodulin binding protein 3; Binds calmodulin in a calcium dependent manner. May function as scaffolding or signaling protein                                                                                                                                                                                                                                                                                                                                                                                                                                                                               |
| SORBS3  | 9606.ENSP00000240123 | sorbin and SH3 domain containing 3; Vinexin alpha isoform promotes up-regulation of actin stress fiber formation. Vinexin beta isoform plays a role in cell spreading and enhances the activation of JNK/SAPK in response to EGF stimulation by using its third SH3 domain                                                                                                                                                                                                                                                                                                                                             |
| DHFR    | 9606.ENSP00000396308 | dihydrofolate reductase                                                                                                                                                                                                                                                                                                                                                                                                                                                                                                                                                                                                |
| TERT    | 9606.ENSP00000309572 | telomerase reverse transcriptase; Telomerase is a ribonucleoprotein enzyme essential for the replication of chromosome termini in most eukaryotes. It elongates telomeres. It is a reverse transcriptase that adds simple sequence repeats to chromosome ends by copying a template sequence within the RNA component of the enzyme                                                                                                                                                                                                                                                                                    |
| PKLR    | 9606.ENSP00000339933 | pyruvate kinase, liver and RBC; Plays a key role in glycolysis (By similarity)                                                                                                                                                                                                                                                                                                                                                                                                                                                                                                                                         |
| PPP2R2D | 9606.ENSP00000381100 | protein phosphatase 2, regulatory subunit B, delta isoform; The B regulatory subunit might modulate substrate selectivity and catalytic activity, and also might direct the localization of the catalytic enzyme to a particular subcellular compartment (By similarity)                                                                                                                                                                                                                                                                                                                                               |
| PPP2R3A | 9606.ENSP00000264977 | protein phosphatase 2 (formerly 2A), regulatory subunit B'', alpha; The B regulatory subunit might modulate substrate selectivity and catalytic activity, and also might direct the localization of the catalytic enzyme to a particular subcellular compartment                                                                                                                                                                                                                                                                                                                                                       |
| CASP3   | 9606.ENSP00000311032 | caspase 3, apoptosis-related cysteine peptidase; Involved in the activation cascade of caspases responsible for apoptosis execution. At the onset of apoptosis it proteolytically cleaves poly(ADP-ribose) polymerase (PARP) at a '216-Asp-[Gly-217' bond. Cleaves and activates sterol regulatory element binding proteins (SREBPs) between the basic helix-loop- helix leucine zipper domain and the membrane attachment domain. Cleaves and activates caspase-6, -7 and -9. Involved in the cleavage of huntingtin                                                                                                  |
| PNN     | 9606.ENSP00000216832 | pinin, desmosome associated protein; Transcriptional activator binding to the E-box 1 core sequence of the E-cadherin promoter gene; the core-binding sequence is 5'CAGGTG-3'. Capable of reversing CTBP1-mediated transcription repression. Component of a splicing-dependent multiprotein exon junction complex (EJC) deposited at splice junction on mRNAs. The EJC is a dynamic structure consisting of a few core proteins and several more peripheral nuclear and cytoplasmic associated factors that join the complex only transiently either during EJC assembly or during subsequent mRNA metabolism. P [...] |
| AHR     | 9606.ENSP00000242057 | aryl hydrocarbon receptor; Ligand-activated transcriptional activator. Binds to the XRE promoter region of genes it activates. Activates the expression of multiple phase I and II xenobiotic chemical metabolizing enzyme genes (such as the CYP1A1 gene). Mediates biochemical and toxic effects of halogenated aromatic hydrocarbons. Involved in cell-cycle regulation. Likely to play an important role in the development and maturation of many tissues                                                                                                                                                         |
| SNAI2   | 9606.ENSP00000020945 | snail homolog 2 (Drosophila); Transcriptional repressor. Involved in the generation and migration of neural crest cells                                                                                                                                                                                                                                                                                                                                                                                                                                                                                                |
| FKBP8   | 9606.ENSP00000222308 | FK506 binding protein 8, 38kDa; Constitutively inactive PPIase, which becomes active when bound to calmodulin and calcium. Seems to act as a chaperone for BCL2, targets it to the mitochondria and modulates its phosphorylation state. The BCL2/FKBP8/calmodulin/calcium complex probably interferes with the binding of BCL2 to its targets. The active form of FKBP8 may therefore play a role in the regulation of apoptosis                                                                                                                                                                                      |



|          |                       |                                                                                                                                                                                                                                                                                                                                                                                                                                                                                                                                                                                                            |
|----------|-----------------------|------------------------------------------------------------------------------------------------------------------------------------------------------------------------------------------------------------------------------------------------------------------------------------------------------------------------------------------------------------------------------------------------------------------------------------------------------------------------------------------------------------------------------------------------------------------------------------------------------------|
| RRM2B    | 9606.ENSPO00000251810 | ribonucleotide reductase M2 B (TP53 inducible); Plays a pivotal role in cell survival by repairing damaged DNA in a p53/TP53-dependent manner. Supplies deoxyribonucleotides for DNA repair in cells arrested at G1 or G2. Contains an iron-tyrosyl free radical center required for catalysis. Forms an active ribonucleotide reductase (RNR) complex with RRM1 which is expressed both in resting and proliferating cells in response to DNA damage                                                                                                                                                      |
| ZMPSTE24 | 9606.ENSPO00000361845 | zinc metalloproteinase (STE24 homolog, <i>S. cerevisiae</i> ); Proteolytically removes the C-terminal three residues of farnesylated proteins. Acts on lamin A/C                                                                                                                                                                                                                                                                                                                                                                                                                                           |
| S100A4   | 9606.ENSPO00000346294 | S100 calcium binding protein A4                                                                                                                                                                                                                                                                                                                                                                                                                                                                                                                                                                            |
| PPP2R2A  | 9606.ENSPO00000370113 | protein phosphatase 2 (formerly 2A), regulatory subunit B, alpha isoform; The B regulatory subunit might modulate substrate selectivity and catalytic activity, and also might direct the localization of the catalytic enzyme to a particular subcellular compartment                                                                                                                                                                                                                                                                                                                                     |
| ANXA2    | 9606.ENSPO00000346032 | annexin A2 pseudogene 1; Calcium-regulated membrane-binding protein whose affinity for calcium is greatly enhanced by anionic phospholipids (By similarity). It binds two calcium ions with high affinity (By similarity). May be involved in heat-stress response (By similarity)                                                                                                                                                                                                                                                                                                                         |
| PPP2R2C  | 9606.ENSPO00000335083 | protein phosphatase 2 (formerly 2A), regulatory subunit B, gamma isoform; The B regulatory subunit might modulate substrate selectivity and catalytic activity, and also might direct the localization of the catalytic enzyme to a particular subcellular compartment                                                                                                                                                                                                                                                                                                                                     |
| SRC      | 9606.ENSPO00000350941 | v-src sarcoma (Schmidt-Ruppin A-2) viral oncogene homolog (avian)                                                                                                                                                                                                                                                                                                                                                                                                                                                                                                                                          |
| PRDX5    | 9606.ENSPO00000265462 | peroxiredoxin 5; Reduces hydrogen peroxide and alkyl hydroperoxides with reducing equivalents provided through the thioredoxin system. Involved in intracellular redox signaling                                                                                                                                                                                                                                                                                                                                                                                                                           |
| EGF      | 9606.ENSPO00000265171 | epidermal growth factor (beta-urogastrone); EGF stimulates the growth of various epidermal and epithelial tissues in vivo and in vitro and of some fibroblasts in cell culture. Magnesiotropic hormone that stimulates magnesium reabsorption in the renal distal convoluted tubule via engagement of EGFR and activation of the magnesium channel TRPM6                                                                                                                                                                                                                                                   |
| MSN      | 9606.ENSPO00000353408 | moesin; Probably involved in connections of major cytoskeletal structures to the plasma membrane                                                                                                                                                                                                                                                                                                                                                                                                                                                                                                           |
| SLC9A3R1 | 9606.ENSPO00000262613 | solute carrier family 9 (sodium/hydrogen exchanger), member 3 regulator 1; Scaffold protein that connects plasma membrane proteins with members of the ezrin/moesin/radixin family and thereby helps to link them to the actin cytoskeleton and to regulate their surface expression. Necessary for recycling of internalized ADRB2. Was first known to play a role in the regulation of the activity and subcellular location of SLC9A3. Necessary for cAMP-mediated phosphorylation and inhibition of SLC9A3. May enhance Wnt signaling. May participate in HTR4 targeting to microvilli (By similarity) |
| TRAPPC2  | 9606.ENSPO00000352708 | trafficking protein particle complex 2; Prevents MBP1-mediated transcriptional repression and antagonizes MBP1-mediated cell death. May play a role in vesicular transport from endoplasmic reticulum to Golgi                                                                                                                                                                                                                                                                                                                                                                                             |
| C1QBP    | 9606.ENSPO00000225698 | complement component 1, q subcomponent binding protein; Not known. Binds to the globular "heads" of C1Q thus inhibiting C1 activation                                                                                                                                                                                                                                                                                                                                                                                                                                                                      |
| ERBB2    | 9606.ENSPO00000269571 | v-erb-b2 erythroblastic leukemia viral oncogene homolog 2, neuro/glioblastoma derived oncogene homolog (avian); Essential component of a neuregulin-receptor complex, although neuregulins do not interact with it alone. GP30 is a potential ligand for this receptor. Not activated by EGF, TGF- alpha and amphiregulin                                                                                                                                                                                                                                                                                  |
| STUB1    | 9606.ENSPO00000219548 | STIP1 homology and U-box containing protein 1; Modulates the activity of several chaperone complexes, including Hsp70, Hsc70 and Hsp90. Has E3 ubiquitin-protein ligase activity and targets misfolded chaperone substrates towards proteasomal degradation. Mediates transfer of non-canonical short ubiquitin chains to HSPA8 that have no effect on HSPA8 degradation                                                                                                                                                                                                                                   |
| SGOL1    | 9606.ENSPO00000263753 | shugoshin-like 1 ( <i>S. pombe</i> ); Plays a central role in chromosome cohesion during mitosis by preventing premature dissociation of cohesin complex from centromeres after prophase, when most of cohesin complex dissociates from chromosomes arms. May act by preventing phosphorylation of the STAG2 subunit of cohesin complex at the centromere, ensuring cohesin persistence at centromere until cohesin cleavage by ESPL1/separase at anaphase                                                                                                                                                 |
| FAM40A   | 9606.ENSPO00000358810 | family with sequence similarity 40, member A                                                                                                                                                                                                                                                                                                                                                                                                                                                                                                                                                               |
| AHSA1    | 9606.ENSPO00000216479 | AHA1, activator of heat shock 90kDa protein ATPase homolog 1 (yeast); Cochaperone that stimulates HSP90 ATPase activity (By similarity). May affect a step in the endoplasmic reticulum to Golgi trafficking                                                                                                                                                                                                                                                                                                                                                                                               |



|         |                      |                                                                                                                                                                                                                                                                                                                                                                                                                                                                                                                                                                                                                          |
|---------|----------------------|--------------------------------------------------------------------------------------------------------------------------------------------------------------------------------------------------------------------------------------------------------------------------------------------------------------------------------------------------------------------------------------------------------------------------------------------------------------------------------------------------------------------------------------------------------------------------------------------------------------------------|
| PGR     | 9606.ENSF00000325120 | progesterone receptor; The steroid hormones and their receptors are involved in the regulation of eukaryotic gene expression and affect cellular proliferation and differentiation in target tissues. Progesterone receptor isoform B (PRB) is involved activation of c-SRC/MAPK signaling on hormone stimulation                                                                                                                                                                                                                                                                                                        |
| LIMK2   | 9606.ENSF00000339916 | LIM domain kinase 2; Displays serine/threonine-specific phosphorylation of myelin basic protein and histone (MBP) in vitro                                                                                                                                                                                                                                                                                                                                                                                                                                                                                               |
| TNS1    | 9606.ENSF00000171887 | tensin 1; May be involved in cell migration, cartilage development and in linking signal transduction pathways to the cytoskeleton                                                                                                                                                                                                                                                                                                                                                                                                                                                                                       |
| ESR1    | 9606.ENSF00000206249 | estrogen receptor 1; Nuclear hormone receptor. The steroid hormones and their receptors are involved in the regulation of eukaryotic gene expression and affect cellular proliferation and differentiation in target tissues                                                                                                                                                                                                                                                                                                                                                                                             |
| DNAJC7  | 9606.ENSF00000406463 | DnaJ (Hsp40) homolog, subfamily C, member 7                                                                                                                                                                                                                                                                                                                                                                                                                                                                                                                                                                              |
| GDPD5   | 9606.ENSF00000337972 | glycerophosphodiester phosphodiesterase domain containing 5; Promotes neurite formation. Cooperates with PRDX1 to drive postmitotic motor neuron differentiation. The glycerophosphodiester phosphodiesterase activity may be required for its role in neuronal differentiation. May contribute to the osmotic regulation of cellular glycerophosphocholine                                                                                                                                                                                                                                                              |
| ARHGDIB | 9606.ENSF00000228945 | Rho GDP dissociation inhibitor (GDI) beta; Regulates the GDP/GTP exchange reaction of the Rho proteins by inhibiting the dissociation of GDP from them, and the subsequent binding of GTP to them                                                                                                                                                                                                                                                                                                                                                                                                                        |
| KRT18   | 9606.ENSF00000373487 | keratin 18; Involved in the uptake of thrombin-antithrombin complexes by hepatic cells (By similarity). When phosphorylated, plays a role in filament reorganization. Involved in the delivery of mutated CFTR to the plasma membrane. Together with KRT8, is involved in interleukin-6 (IL-6)-mediated barrier protection                                                                                                                                                                                                                                                                                               |
| PLS3    | 9606.ENSF00000348163 | plastin 3 (T isoform); Actin-bundling protein found in intestinal microvilli, hair cell stereocilia, and fibroblast filopodia                                                                                                                                                                                                                                                                                                                                                                                                                                                                                            |
| STAT3   | 9606.ENSF00000264657 | signal transducer and activator of transcription 3 (acute-phase response factor); Transcription factor that binds to the interleukin-6 (IL-6)-responsive elements identified in the promoters of various acute-phase protein genes. Activated by IL31 through IL31RA                                                                                                                                                                                                                                                                                                                                                     |
| KRT8    | 9606.ENSF00000293308 | keratin 8; Together with KRT19, helps to link the contractile apparatus to dystrophin at the costameres of striated muscle                                                                                                                                                                                                                                                                                                                                                                                                                                                                                               |
| CTNNA1  | 9606.ENSF00000304669 | catenin (cadherin-associated protein), alpha 1, 102kDa; Associates with the cytoplasmic domain of a variety of cadherins. The association of catenins to cadherins produces a complex which is linked to the actin filament network, and which seems to be of primary importance for cadherins cell-adhesion properties. May play a crucial role in cell differentiation                                                                                                                                                                                                                                                 |
| NARF    | 9606.ENSF00000309899 | nuclear prelamin A recognition factor                                                                                                                                                                                                                                                                                                                                                                                                                                                                                                                                                                                    |
| BANF1   | 9606.ENSF00000310275 | barrier to autointegration factor 1; Plays fundamental roles in nuclear assembly, chromatin organization, gene expression and gonad development. May potentially compress chromatin structure and be involved in membrane recruitment and chromatin decondensation during nuclear assembly. Contains 2 non-specific dsDNA-binding sites which may promote DNA cross-bridging. Exploited by retroviruses for inhibiting self-destructing autointegration of retroviral DNA, thereby promoting integration of viral DNA into the host chromosome. EMD and BAF are cooperative cofactors of HIV-1 infection. Associat [...] |
| PPP2CB  | 9606.ENSF00000221138 | protein phosphatase 2 (formerly 2A), catalytic subunit, beta isoform; PP2A can modulate the activity of phosphorylase B kinase casein kinase 2, mitogen-stimulated S6 kinase, and MAP-2 kinase. Can dephosphorylate SV40 large T antigen and p53. Dephosphorylates SV40 large T antigen, preferentially on serine residues 120, 123, 677, and perhaps 679. The C subunit was most active, followed by the AC form, which was more active than the ABC form, and activity of all three forms was strongly stimulated by manganese, and to a lesser extent by magnesium. Dephosphorylation by the AC form, but not [...]   |
| TMPO    | 9606.ENSF00000266732 | thymopoietin; May help direct the assembly of the nuclear lamina and thereby help maintain the structural organization of the nuclear envelope. Possible receptor for attachment of lamin filaments to the inner nuclear membrane. May be involved in the control of initiation of DNA replication through its interaction with NAKAP95                                                                                                                                                                                                                                                                                  |
| MAP3K5  | 9606.ENSF00000351908 | mitogen-activated protein kinase kinase kinase 5; Component of a protein kinase signal transduction cascade. Phosphorylates and activates MAP2K4 and MAP2K6, which in turn activate the JNK and p38 MAP kinases, respectively. Overexpression induces apoptotic cell death                                                                                                                                                                                                                                                                                                                                               |

|         |                      |                                                                                                                                                                                                                                                                                                                                                                                                                                                                                                                                                                                                                        |
|---------|----------------------|------------------------------------------------------------------------------------------------------------------------------------------------------------------------------------------------------------------------------------------------------------------------------------------------------------------------------------------------------------------------------------------------------------------------------------------------------------------------------------------------------------------------------------------------------------------------------------------------------------------------|
| PPP2R5A | 9606.ENSP00000261461 | protein phosphatase 2, regulatory subunit B', alpha isoform; The B regulatory subunit might modulate substrate selectivity and catalytic activity, and also might direct the localization of the catalytic enzyme to a particular subcellular compartment                                                                                                                                                                                                                                                                                                                                                              |
| PFN1    | 9606.ENSP00000225655 | profilin 1; Binds to actin and affects the structure of the cytoskeleton. At high concentrations, profilin prevents the polymerization of actin, whereas it enhances it at low concentrations. By binding to PIP2, it inhibits the formation of IP3 and DG                                                                                                                                                                                                                                                                                                                                                             |
| FPR2    | 9606.ENSP00000340191 | formyl peptide receptor 2; Low affinity receptor for N-formyl-methionyl peptides, which are powerful neutrophils chemotactic factors. Binding of FMLP to the receptor causes activation of neutrophils. This response is mediated via a G-protein that activates a phosphatidylinositol-calcium second messenger system. The activation of LXA4R could result in an anti-inflammatory outcome counteracting the actions of proinflammatory signals such as LTB4 (leukotriene B4)                                                                                                                                       |
| MYC     | 9606.ENSP00000367207 | v-myc myelocytomatosis viral oncogene homolog (avian); Participates in the regulation of gene transcription. Binds DNA in a non-specific manner, yet also specifically recognizes the core sequence 5'-CAC[GA]TG-3'. Seems to activate the transcription of growth-related genes                                                                                                                                                                                                                                                                                                                                       |
| CDK4    | 9606.ENSP00000257904 | cyclin-dependent kinase 4; Probably involved in the control of the cell cycle                                                                                                                                                                                                                                                                                                                                                                                                                                                                                                                                          |
| PPP2R5B | 9606.ENSP00000164133 | protein phosphatase 2, regulatory subunit B', beta isoform; The B regulatory subunit might modulate substrate selectivity and catalytic activity, and also might direct the localization of the catalytic enzyme to a particular subcellular compartment                                                                                                                                                                                                                                                                                                                                                               |
| FPR1    | 9606.ENSP00000302707 | formyl peptide receptor 1; High affinity receptor for N-formyl-methionyl peptides, which are powerful neutrophils chemotactic factors. Binding of FMLP to the receptor causes activation of neutrophils. This response is mediated via a G-protein that activates a phosphatidylinositol-calcium second messenger system                                                                                                                                                                                                                                                                                               |
| AKT1    | 9606.ENSP00000270202 | v-akt murine thymoma viral oncogene homolog 1; General protein kinase capable of phosphorylating several known proteins. Phosphorylates TBC1D4. Signals downstream of phosphatidylinositol 3-kinase (PI(3)K) to mediate the effects of various growth factors such as platelet-derived growth factor (PDGF), epidermal growth factor (EGF), insulin and insulin-like growth factor I (IGF-I). Plays a role in glucose transport by mediating insulin-induced translocation of the GLUT4 glucose transporter to the cell surface. Mediates the antiapoptotic effects of IGF-I. Mediates insulin-stimulated protei [...] |
| PPP2R2B | 9606.ENSP00000336591 | protein phosphatase 2 (formerly 2A), regulatory subunit B, beta isoform; The B regulatory subunit might modulate substrate selectivity and catalytic activity, and also might direct the localization of the catalytic enzyme to a particular subcellular compartment. Within the PP2A holoenzyme complex, isoform 2 is required to promote proapoptotic activity (By similarity). Isoform 2 regulates neuronal survival through the mitochondrial fission and fusion balance (By similarity)                                                                                                                          |
| TLN1    | 9606.ENSP00000316029 | talin 1; Probably involved in connections of major cytoskeletal structures to the plasma membrane. High molecular weight cytoskeletal protein concentrated at regions of cell-substratum contact and, in lymphocytes, at cell-cell contacts (By similarity)                                                                                                                                                                                                                                                                                                                                                            |
| IKBKB   | 9606.ENSP00000339151 | inhibitor of kappa light polypeptide gene enhancer in B-cells, kinase beta; Acts as part of the IKK complex in the conventional pathway of NF-kappa-B activation and phosphorylates inhibitors of NF-kappa-B thus leading to the dissociation of the inhibitor/NF-kappa-B complex and ultimately the degradation of the inhibitor. Also phosphorylates NCOA3                                                                                                                                                                                                                                                           |
| HSPB1   | 9606.ENSP00000248553 | heat shock 27kDa protein 1; Involved in stress resistance and actin organization                                                                                                                                                                                                                                                                                                                                                                                                                                                                                                                                       |
| CTSB    | 9606.ENSP00000342070 | cathepsin B; Thiol protease which is believed to participate in intracellular degradation and turnover of proteins. Has also been implicated in tumor invasion and metastasis                                                                                                                                                                                                                                                                                                                                                                                                                                          |
| VCL     | 9606.ENSP00000211998 | vinculin; Involved in cell adhesion. May be involved in the attachment of the actin-based microfilaments to the plasma membrane. May also play important roles in cell morphology and locomotion                                                                                                                                                                                                                                                                                                                                                                                                                       |
| TBPL2   | 9606.ENSP00000247219 | TATA box binding protein like 2; Transcription factor required in complex with TAF3 for the differentiation of myoblasts into myocytes. The complex replaces TFIID at specific promoters at an early stage in the differentiation process (By similarity)                                                                                                                                                                                                                                                                                                                                                              |
| ANXA5   | 9606.ENSP00000296511 | annexin A5; This protein is an anticoagulant protein that acts as an indirect inhibitor of the thromboplastin-specific complex, which is involved in the blood coagulation cascade                                                                                                                                                                                                                                                                                                                                                                                                                                     |

|       |                      |                                                                                                                                                                                                                                                                                                                                                                                                                                                                                                                                                                                                                        |
|-------|----------------------|------------------------------------------------------------------------------------------------------------------------------------------------------------------------------------------------------------------------------------------------------------------------------------------------------------------------------------------------------------------------------------------------------------------------------------------------------------------------------------------------------------------------------------------------------------------------------------------------------------------------|
| ANXA1 | 9606.ENSP00000257497 | annexin A1; Calcium/phospholipid-binding protein which promotes membrane fusion and is involved in exocytosis. This protein regulates phospholipase A2 activity. It seems to bind from two to four calcium ions with high affinity                                                                                                                                                                                                                                                                                                                                                                                     |
| OSBP2 | 9606.ENSP00000332576 | oxysterol binding protein 2; Binds 7-ketocholesterol                                                                                                                                                                                                                                                                                                                                                                                                                                                                                                                                                                   |
| F3    | 9606.ENSP00000334145 | coagulation factor III (thromboplastin, tissue factor); Initiates blood coagulation by forming a complex with circulating factor VII or VIIa. The [TF:VIIa] complex activates factors IX or X by specific limited proteolysis. TF plays a role in normal hemostasis by initiating the cell-surface assembly and propagation of the coagulation protease cascade                                                                                                                                                                                                                                                        |
| ANXA3 | 9606.ENSP00000264908 | annexin A3; Inhibitor of phospholipase A2, also possesses anti- coagulant properties. Also cleaves the cyclic bond of inositol 1,2-cyclic phosphate to form inositol 1-phosphate                                                                                                                                                                                                                                                                                                                                                                                                                                       |
| TCHP  | 9606.ENSP00000324404 | trichoplein, keratin filament binding; May act as a 'capping' or 'branching' protein for keratin filaments in the cell periphery. May regulate K8/K18 filament and desmosome organization mainly at the apical or peripheral regions of simple epithelial cells                                                                                                                                                                                                                                                                                                                                                        |
| SF3A2 | 9606.ENSP00000221494 | splicing factor 3a, subunit 2, 66kDa; Subunit of the splicing factor SF3A required for 'A' complex assembly formed by the stable binding of U2 snRNP to the branchpoint sequence (BPS) in pre-mRNA. Sequence independent binding of SF3A/SF3B complex upstream of the branch site is essential, it may anchor U2 snRNP to the pre-mRNA. May also be involved in the assembly of the 'E' complex                                                                                                                                                                                                                        |
| GDI1  | 9606.ENSP00000394071 | GDP dissociation inhibitor 1; Regulates the GDP/GTP exchange reaction of most Rab proteins by inhibiting the dissociation of GDP from them, and the subsequent binding of GTP to them                                                                                                                                                                                                                                                                                                                                                                                                                                  |
| HSPA4 | 9606.ENSP00000302961 | heat shock 70kDa protein 4                                                                                                                                                                                                                                                                                                                                                                                                                                                                                                                                                                                             |
| FPR3  | 9606.ENSP00000341821 | formyl peptide receptor 3; Low affinity receptor for N-formyl-methionyl peptides, which are powerful neutrophils chemotactic factors. Binding of FMLP to the receptor causes activation of neutrophils. This response is mediated via a G-protein that activates a phosphatidylinositol-calcium second messenger system                                                                                                                                                                                                                                                                                                |
| ANXA6 | 9606.ENSP00000346550 | annexin A6; May associate with CD21. May regulate the release of Ca(2+) from intracellular stores                                                                                                                                                                                                                                                                                                                                                                                                                                                                                                                      |
| FN1   | 9606.ENSP00000346839 | fibronectin 1; Fibronectins bind cell surfaces and various compounds including collagen, fibrin, heparin, DNA, and actin. Fibronectins are involved in cell adhesion, cell motility, opsonization, wound healing, and maintenance of cell shape                                                                                                                                                                                                                                                                                                                                                                        |
| HIF1A | 9606.ENSP00000338018 | hypoxia inducible factor 1, alpha subunit (basic helix-loop-helix transcription factor); Functions as a master transcriptional regulator of the adaptive response to hypoxia. Under hypoxic conditions activates the transcription of over 40 genes, including, erythropoietin, glucose transporters, glycolytic enzymes, vascular endothelial growth factor, and other genes whose protein products increase oxygen delivery or facilitate metabolic adaptation to hypoxia. Plays an essential role in embryonic vascularization, tumor angiogenesis and pathophysiology of ischemic disease. Binds to core DNA [...] |
| RHOA  | 9606.ENSP00000400175 | ras homolog gene family, member A; Regulates a signal transduction pathway linking plasma membrane receptors to the assembly of focal adhesions and actin stress fibers. Serves as a target for the yopT cysteine peptidase from Yersinia pestis, vector of the plague, and Yersinia pseudotuberculosis, which causes gastrointestinal disorders. May be an activator of PLCE1. Activated by ARHGEF2, which promotes the exchange of GDP for GTP                                                                                                                                                                       |
| TPM1  | 9606.ENSP00000267996 | tropomyosin 1 (alpha); Binds to actin filaments in muscle and non-muscle cells. Plays a central role, in association with the troponin complex, in the calcium dependent regulation of vertebrate striated muscle contraction. Smooth muscle contraction is regulated by interaction with caldesmon. In non-muscle cells is implicated in stabilizing cytoskeleton actin filaments                                                                                                                                                                                                                                     |
| VASP  | 9606.ENSP00000245932 | vasodilator-stimulated phosphoprotein; Ena/VASP proteins are actin-associated proteins involved in a range of processes dependent on cytoskeleton remodeling and cell polarity such as axon guidance, lamellipodial and filopodial dynamics, platelet activation and cell migration. VASP promotes actin filament elongation. It protects the barbed end of growing actin filaments against capping and increases the rate of actin polymerization in the presence of capping protein. VASP stimulates actin filament elongation by promoting the transfer of profilin- bound actin monomers onto the barbed end [...] |

|         |                      |                                                                                                                                                                                                                                                                                                                                                                                                                                                                                                                                                                                                                        |
|---------|----------------------|------------------------------------------------------------------------------------------------------------------------------------------------------------------------------------------------------------------------------------------------------------------------------------------------------------------------------------------------------------------------------------------------------------------------------------------------------------------------------------------------------------------------------------------------------------------------------------------------------------------------|
| CHEK1   | 9606.ENSP00000278916 | CHK1 checkpoint homolog (S. pombe); Required for checkpoint mediated cell cycle arrest in response to DNA damage or the presence of unreplicated DNA. May also negatively regulate cell cycle progression during unperturbed cell cycles. Recognizes the substrate consensus sequence [R-X-X- S/T]. Binds to and phosphorylates CDC25A, CDC25B and CDC25C. Phosphorylation of CDC25A at 'Ser-178' and 'Thr-507' and phosphorylation of CDC25C at 'Ser-216' creates binding sites for 14-3-3 proteins which inhibit CDC25A and CDC25C. Phosphorylation of CDC25A at 'Ser-76', 'Ser-124', 'Ser-178', 'Ser-279' and [...] |
| TPM4    | 9606.ENSP00000345230 | tropomyosin 4; Binds to actin filaments in muscle and non-muscle cells. Plays a central role, in association with the troponin complex, in the calcium dependent regulation of vertebrate striated muscle contraction. Smooth muscle contraction is regulated by interaction with caldesmon. In non-muscle cells is implicated in stabilizing cytoskeleton actin filaments. Binds calcium                                                                                                                                                                                                                              |
| S100A10 | 9606.ENSP00000357799 | S100 calcium binding protein A10; Because S100A10 induces the dimerization of ANXA2/p36, it may function as a regulator of protein phosphorylation in that the ANXA2 monomer is the preferred target (in vitro) of tyrosine- specific kinase                                                                                                                                                                                                                                                                                                                                                                           |
| ALDOA   | 9606.ENSP00000336927 | aldolase A, fructose-bisphosphate                                                                                                                                                                                                                                                                                                                                                                                                                                                                                                                                                                                      |
| NFKB1   | 9606.ENSP00000226574 | nuclear factor of kappa light polypeptide gene enhancer in B-cells 1; NF-kappa-B is a pleiotropic transcription factor which is present in almost all cell types and is involved in many biological processes such as inflammation, immunity, differentiation, cell growth, tumorigenesis and apoptosis. NF- kappa-B is a homo- or heterodimeric complex formed by the Rel-like domain-containing proteins RELA/p65, RELB, NFKB1/p105, NFKB1/p50, REL and NFKB2/p52 and the heterodimeric p65-p50 complex appears to be most abundant one. The dimers bind at kappa-B sites in the DNA of their target genes and [...] |
| PRDX2   | 9606.ENSP00000301522 | peroxiredoxin 2; Involved in redox regulation of the cell. Reduces peroxides with reducing equivalents provided through the thioredoxin system. It is not able to receive electrons from glutaredoxin. May play an important role in eliminating peroxides generated during metabolism. Might participate in the signaling cascades of growth factors and tumor necrosis factor-alpha by regulating the intracellular concentrations of H(2)O(2)                                                                                                                                                                       |
| ETV5    | 9606.ENSP00000306894 | ets variant 5; Binds to DNA sequences containing the consensus nucleotide core sequence GGAA                                                                                                                                                                                                                                                                                                                                                                                                                                                                                                                           |
| RRM1    | 9606.ENSP00000300738 | ribonucleotide reductase M1; Provides the precursors necessary for DNA synthesis. Catalyzes the biosynthesis of deoxyribonucleotides from the corresponding ribonucleotides (By similarity)                                                                                                                                                                                                                                                                                                                                                                                                                            |
| ME1     | 9606.ENSP00000358719 | malic enzyme 1, NADP(+)-dependent, cytosolic                                                                                                                                                                                                                                                                                                                                                                                                                                                                                                                                                                           |
| VCAM1   | 9606.ENSP00000294728 | vascular cell adhesion molecule 1; Important in cell-cell recognition. Appears to function in leukocyte-endothelial cell adhesion. Interacts with the beta-1 integrin VLA4 on leukocytes, and mediates both adhesion and signal transduction. The VCAM1/VLA4 interaction may play a pathophysiologic role both in immune responses and in leukocyte emigration to sites of inflammation                                                                                                                                                                                                                                |
| S100A11 | 9606.ENSP00000271638 | S100 calcium binding protein A11; Facilitates the differentiation and the cornification of keratinocytes                                                                                                                                                                                                                                                                                                                                                                                                                                                                                                               |
| MYH6    | 9606.ENSP00000348634 | myosin, heavy chain 6, cardiac muscle, alpha; Muscle contraction                                                                                                                                                                                                                                                                                                                                                                                                                                                                                                                                                       |
| SPN     | 9606.ENSP00000353238 | sialophorin; One of the major glycoproteins of thymocytes and T lymphocytes. Plays a role in the physicochemical properties of the T-cell surface and in lectin binding. Presents carbohydrate ligands to selectins. Has an extended rodlike structure that could protrude above the glycocalyx of the cell and allow multiple glycan chains to be accessible for binding. Is a counter receptor for SN/Siglec-1 (By similarity). During T-cell activation is actively removed from the T-cell-APC (antigen-presenting cell) contact site thus suggesting a negative regulatory role in adaptive immune response [...] |
| ENO1    | 9606.ENSP00000234590 | enolase 1, (alpha); Multifunctional enzyme that, as well as its role in glycolysis, plays a part in various processes such as growth control, hypoxia tolerance and allergic responses. May also function in the intravascular and pericellular fibrinolytic system due to its ability to serve as a receptor and activator of plasminogen on the cell surface of several cell-types such as leukocytes and neurons. Stimulates immunoglobulin production                                                                                                                                                              |
| TPD52   | 9606.ENSP00000368391 | tumor protein D52                                                                                                                                                                                                                                                                                                                                                                                                                                                                                                                                                                                                      |
| PRKCA   | 9606.ENSP00000284384 | protein kinase C, alpha; This is a calcium-activated, phospholipid-dependent, serine- and threonine-specific enzyme. May play a role in cell motility by phosphorylating CSPG4                                                                                                                                                                                                                                                                                                                                                                                                                                         |
| CDC37   | 9606.ENSP00000222005 | microRNA 1181; Co-chaperone that binds to numerous kinases and promotes their interaction with the Hsp90 complex, resulting in stabilization and promotion of their activity                                                                                                                                                                                                                                                                                                                                                                                                                                           |

|        |                      |                                                                                                                                                                                                                                                                                                                                                                                                                                                                                                                                                                                                                        |
|--------|----------------------|------------------------------------------------------------------------------------------------------------------------------------------------------------------------------------------------------------------------------------------------------------------------------------------------------------------------------------------------------------------------------------------------------------------------------------------------------------------------------------------------------------------------------------------------------------------------------------------------------------------------|
| CD46   | 9606.ENSP00000313875 | CD46 molecule, complement regulatory protein; Acts as a cofactor for complement factor I, a serine protease which protects autologous cells against complement-mediated injury by cleaving C3b and C4b deposited on host tissue. May be involved in the fusion of the spermatozoa with the oocyte during fertilization. Also acts as a costimulatory factor for T- cells which induces the differentiation of CD4+ into T-regulatory 1 cells. T-regulatory 1 cells suppress immune responses by secreting interleukin-10, and therefore are thought to prevent autoimmunity. A number of viral and bacterial pa [...]  |
| KRT5   | 9606.ENSP00000252242 | keratin 5                                                                                                                                                                                                                                                                                                                                                                                                                                                                                                                                                                                                              |
| ACTC1  | 9606.ENSP00000290378 | actin, alpha, cardiac muscle 1; Actins are highly conserved proteins that are involved in various types of cell motility and are ubiquitously expressed in all eukaryotic cells (By similarity)                                                                                                                                                                                                                                                                                                                                                                                                                        |
| HSF1   | 9606.ENSP00000332698 | heat shock transcription factor 1; DNA-binding protein that specifically binds heat shock promoter elements (HSE) and activates transcription. In higher eukaryotes, HSF is unable to bind to the HSE unless the cells are heat shocked                                                                                                                                                                                                                                                                                                                                                                                |
| ACTN2  | 9606.ENSP00000355537 | actinin, alpha 2; F-actin cross-linking protein which is thought to anchor actin to a variety of intracellular structures. This is a bundling protein                                                                                                                                                                                                                                                                                                                                                                                                                                                                  |
| KRT19  | 9606.ENSP00000355124 | keratin 19; Involved in the organization of myofibers. Together with KRT8, helps to link the contractile apparatus to dystrophin at the costameres of striated muscle                                                                                                                                                                                                                                                                                                                                                                                                                                                  |
| PPP2CA | 9606.ENSP00000418447 | protein phosphatase 2 (formerly 2A), catalytic subunit, alpha isoform; PP2A can modulate the activity of phosphorylase B kinase casein kinase 2, mitogen-stimulated S6 kinase, and MAP-2 kinase. Can dephosphorylate SV40 large T antigen and p53. Dephosphorylates SV40 large T antigen, preferentially on serine residues 120, 123, 677, and perhaps 679. The C subunit was most active, followed by the AC form, which was more active than the ABC form, and activity of all three forms was strongly stimulated by manganese, and to a lesser extent by magnesium. Dephosphorylation by the AC form, but no [...] |
| LAMA2  | 9606.ENSP00000400365 | laminin, alpha 2; Binding to cells via a high affinity receptor, laminin is thought to mediate the attachment, migration and organization of cells into tissues during embryonic development by interacting with other extracellular matrix components                                                                                                                                                                                                                                                                                                                                                                 |
| PCNA   | 9606.ENSP00000368438 | proliferating cell nuclear antigen; This protein is an auxiliary protein of DNA polymerase delta and is involved in the control of eukaryotic DNA replication by increasing the polymerase's processibility during elongation of the leading strand (By similarity)                                                                                                                                                                                                                                                                                                                                                    |
| UCK2   | 9606.ENSP00000356853 | uridine-cytidine kinase 2; Phosphorylates uridine and cytidine to uridine monophosphate and cytidine monophosphate. Does not phosphorylate deoxyribonucleosides or purine ribonucleosides. Can use ATP or GTP as a phosphate donor. Can also phosphorylate cytidine and uridine nucleoside analogs such as 6-azauridine, 5-fluorouridine, 4- thioridine, 5-bromouridine, N(4)-acetylcytidine, N(4)-benzoylcytidine, 5-fluorocytidine, 2-thiocytidine, 5- methylcytidine, and N(4)-anisoylcytidine                                                                                                                      |
| CHUK   | 9606.ENSP00000359424 | conserved helix-loop-helix ubiquitous kinase; Acts as part of the IKK complex in the conventional pathway of NF-kappa-B activation and phosphorylates inhibitors of NF-kappa-B thus leading to the dissociation of the inhibitor/NF- kappa-B complex and ultimately the degradation of the inhibitor. As part of the non-canonical pathway of NF-kappa-B activation, the MAP3K14-activated CHUK/IKKA homodimer phosphorylates NFKB2/p100 associated with RelB, inducing its proteolytic processing to NFKB2/p52 and the formation of NF-kappa-B RelB-p52 complexes. Also phosphorylates NCOA3. Phosphorylates 'S [...] |
| KRT16  | 9606.ENSP00000301653 | keratin 16                                                                                                                                                                                                                                                                                                                                                                                                                                                                                                                                                                                                             |
| EZR    | 9606.ENSP00000338934 | ezrin; Probably involved in connections of major cytoskeletal structures to the plasma membrane. In epithelial cells, required for the formation of microvilli and membrane ruffles on the apical pole. Along with PLEKHG6, required for normal macropinocytosis                                                                                                                                                                                                                                                                                                                                                       |
| RUVBL1 | 9606.ENSP00000318297 | RuvB-like 1 (E. coli); Possesses single-stranded DNA-stimulated ATPase and ATP-dependent DNA helicase (3' to 5') activity. Component of the NuA4 histone acetyltransferase complex which is involved in transcriptional activation of select genes principally by acetylation of nucleosomal histones H4 and H2A. This modification may both alter nucleosome - DNA interactions and promote interaction of the modified histones with other proteins which positively regulate transcription. This complex may be required for the activation of transcriptional programs associated with oncogene and proto-o [...]  |



|          |                      |                                                                                                                                                                                                                                                                                                                                                                                                                                                                                                                                                                                                                        |
|----------|----------------------|------------------------------------------------------------------------------------------------------------------------------------------------------------------------------------------------------------------------------------------------------------------------------------------------------------------------------------------------------------------------------------------------------------------------------------------------------------------------------------------------------------------------------------------------------------------------------------------------------------------------|
| KAT5     | 9606.ENSP00000340330 | K(lysine) acetyltransferase 5; Catalytic subunit of the NuA4 histone acetyltransferase complex which is involved in transcriptional activation of select genes principally by acetylation of nucleosomal histones H4 and H2A. This modification may both alter nucleosome-DNA interactions and promote interaction of the modified histones with other proteins which positively regulate transcription. This complex may be required for the activation of transcriptional programs associated with oncogene and proto-oncogene mediated growth induction, tumor suppressor mediated growth arrest and replicat [...] |
| APAF1    | 9606.ENSP00000353059 | apoptotic peptidase activating factor 1; Oligomeric Apaf-1 mediates the cytochrome c-dependent autocatalytic activation of pro-caspase-9 (Apaf-3), leading to the activation of caspase-3 and apoptosis. This activation requires ATP. Isoform 6 is less effective in inducing apoptosis                                                                                                                                                                                                                                                                                                                               |
| VIM      | 9606.ENSP00000224237 | vimentin; Vimentins are class-III intermediate filaments found in various non-epithelial cells, especially mesenchymal cells                                                                                                                                                                                                                                                                                                                                                                                                                                                                                           |
| TMSB4X   | 9606.ENSP00000370007 | thymosin beta 4, X-linked; Plays an important role in the organization of the cytoskeleton (By similarity). Binds to and sequesters actin monomers (G actin) and therefore inhibits actin polymerization                                                                                                                                                                                                                                                                                                                                                                                                               |
| LDHB     | 9606.ENSP00000229319 | lactate dehydrogenase B                                                                                                                                                                                                                                                                                                                                                                                                                                                                                                                                                                                                |
| EIF2AK1  | 9606.ENSP00000199389 | eukaryotic translation initiation factor 2-alpha kinase 1; Mediates down-regulation of protein synthesis in response to various stress conditions by the phosphorylation of EIF2S1 at 'Ser-48' and 'Ser-51'. Protein synthesis is inhibited at the level of initiation (By similarity)                                                                                                                                                                                                                                                                                                                                 |
| S100A1   | 9606.ENSP00000292169 | S100 calcium binding protein A1; Weakly binds calcium but binds zinc very tightly-distinct binding sites with different affinities exist for both ions on each monomer. Physiological concentrations of potassium ion antagonize the binding of both divalent cations, especially affecting high-affinity calcium-binding sites                                                                                                                                                                                                                                                                                        |
| CASP7    | 9606.ENSP00000298700 | caspase 7, apoptosis-related cysteine peptidase; Involved in the activation cascade of caspases responsible for apoptosis execution. Cleaves and activates sterol regulatory element binding proteins (SREBPs). Proteolytically cleaves poly(ADP-ribose) polymerase (PARP) at a '216-Asp- -Gly- 217' bond. Overexpression promotes programmed cell death                                                                                                                                                                                                                                                               |
| HSP90AA1 | 9606.ENSP00000335153 | heat shock protein 90kDa alpha (cytosolic), class A member 1; Molecular chaperone. Has ATPase activity (By similarity)                                                                                                                                                                                                                                                                                                                                                                                                                                                                                                 |
| PPP2R5E  | 9606.ENSP00000337641 | protein phosphatase 2, regulatory subunit B', epsilon isoform; The B regulatory subunit might modulate substrate selectivity and catalytic activity, and also might direct the localization of the catalytic enzyme to a particular subcellular compartment                                                                                                                                                                                                                                                                                                                                                            |
| KRT7     | 9606.ENSP00000329243 | keratin 7; Blocks interferon-dependent interphase and stimulates DNA synthesis in cells. Involved in the translational regulation of the human papillomavirus type 16 E7 mRNA (HPV16 E7)                                                                                                                                                                                                                                                                                                                                                                                                                               |
| ICAM3    | 9606.ENSP00000160262 | intercellular adhesion molecule 3; ICAM proteins are ligands for the leukocyte adhesion protein LFA-1 (integrin alpha-L/beta-2). ICAM3 is also a ligand for integrin alpha-D/beta-2                                                                                                                                                                                                                                                                                                                                                                                                                                    |
| ACTB     | 9606.ENSP00000349960 | actin, beta; Actins are highly conserved proteins that are involved in various types of cell motility and are ubiquitously expressed in all eukaryotic cells (By similarity)                                                                                                                                                                                                                                                                                                                                                                                                                                           |
| IKBKG    | 9606.ENSP00000358622 | inhibitor of kappa light polypeptide gene enhancer in B-cells, kinase gamma; Regulatory subunit of the IKK core complex which phosphorylates inhibitors of NF-kappa-B thus leading to the dissociation of the inhibitor/NF-kappa-B complex and ultimately the degradation of the inhibitor. Also considered to be a mediator for TAX activation of NF-kappa-B. Could be implicated in NF-kappa- B-mediated protection from cytokine toxicity (By similarity)                                                                                                                                                           |
| TTN      | 9606.ENSP00000348444 | titin                                                                                                                                                                                                                                                                                                                                                                                                                                                                                                                                                                                                                  |
| SLMAP    | 9606.ENSP00000295951 | sarcolemma associated protein; May play a role during myoblast fusion (By similarity)                                                                                                                                                                                                                                                                                                                                                                                                                                                                                                                                  |
| RRM2     | 9606.ENSP00000302955 | ribonucleotide reductase M2; Provides the precursors necessary for DNA synthesis. Catalyzes the biosynthesis of deoxyribonucleotides from the corresponding ribonucleotides. Inhibits Wnt signaling                                                                                                                                                                                                                                                                                                                                                                                                                    |
| GPI      | 9606.ENSP00000348877 | glucose phosphate isomerase; Besides it's role as a glycolytic enzyme, mammalian GPI can function as a tumor-secreted cytokine and an angiogenic factor (AMF) that stimulates endothelial cell motility. GPI is also a neurotrophic factor (Neuroleukin) for spinal and sensory neurons                                                                                                                                                                                                                                                                                                                                |

|         |                      |                                                                                                                                                                                                                                                                                                                                                                                                                                                                                                                                                                                                                        |
|---------|----------------------|------------------------------------------------------------------------------------------------------------------------------------------------------------------------------------------------------------------------------------------------------------------------------------------------------------------------------------------------------------------------------------------------------------------------------------------------------------------------------------------------------------------------------------------------------------------------------------------------------------------------|
| CDH1    | 9606.ENSPO0000261769 | cadherin 1, type 1, E-cadherin (epithelial); Cadherins are calcium-dependent cell adhesion proteins. They preferentially interact with themselves in a homophilic manner in connecting cells; cadherins may thus contribute to the sorting of heterogeneous cell types. CDH1 is involved in mechanisms regulating cell-cell adhesions, mobility and proliferation of epithelial cells. Has a potent invasive suppressor role. It is a ligand for integrin alpha-E/beta-7                                                                                                                                               |
| LIMK1   | 9606.ENSPO0000336740 | LIM domain kinase 1; Protein kinase which regulates actin filament dynamics. Phosphorylates and inactivates the actin binding/depolymerizing factor cofilin, thereby stabilizing the actin cytoskeleton. Isoform 3 has a dominant negative effect on actin cytoskeletal changes. May be involved in brain development                                                                                                                                                                                                                                                                                                  |
| ZNF239  | 9606.ENSPO0000307774 | zinc finger protein 239; May be involved in transcriptional regulation                                                                                                                                                                                                                                                                                                                                                                                                                                                                                                                                                 |
| SUGT1   | 9606.ENSPO0000367208 | SGT1, suppressor of G2 allele of SKP1 ( <i>S. cerevisiae</i> ); May play a role in ubiquitination and subsequent proteosomal degradation of target proteins                                                                                                                                                                                                                                                                                                                                                                                                                                                            |
| HSPE1   | 9606.ENSPO0000233893 | heat shock 10kDa protein 1 (chaperonin 10); Eukaryotic CPN10 homolog which is essential for mitochondrial protein biogenesis, together with CPN60. Binds to CPN60 in the presence of Mg-ATP and suppresses the ATPase activity of the latter                                                                                                                                                                                                                                                                                                                                                                           |
| PPP2R5C | 9606.ENSPO0000333905 | protein phosphatase 2, regulatory subunit B', gamma isoform; The B regulatory subunit might modulate substrate selectivity and catalytic activity, and also might direct the localization of the catalytic enzyme to a particular subcellular compartment                                                                                                                                                                                                                                                                                                                                                              |
| TUBA1B  | 9606.ENSPO0000336799 | tubulin, alpha 1b; Tubulin is the major constituent of microtubules. It binds two moles of GTP, one at an exchangeable site on the beta chain and one at a non-exchangeable site on the alpha-chain (By similarity)                                                                                                                                                                                                                                                                                                                                                                                                    |
| CLIC1   | 9606.ENSPO0000408094 | chloride intracellular channel 1; Can insert into membranes and form chloride ion channels. Channel activity depends on the pH. Membrane insertion seems to be redox-regulated and may occur only under oxidizing conditions                                                                                                                                                                                                                                                                                                                                                                                           |
| STRN4   | 9606.ENSPO0000375777 | striatin, calmodulin binding protein 4; Binds calmodulin in a calcium dependent manner. May function as scaffolding or signaling protein                                                                                                                                                                                                                                                                                                                                                                                                                                                                               |
| SRXN1   | 9606.ENSPO0000371388 | sulfiredoxin 1 homolog ( <i>S. cerevisiae</i> ); Contributes to oxidative stress resistance by reducing cysteine-sulfinic acid formed under exposure to oxidants in the peroxiredoxins PRDX1, PRDX2, PRDX3 and PRDX4. Does not act on PRDX5 or PRDX6. May catalyze the reduction in a multi-step process by acting both as a specific phosphotransferase and a thioltransferase                                                                                                                                                                                                                                        |
| CDK1    | 9606.ENSPO0000306043 | cyclin-dependent kinase 1; Plays a key role in the control of the eukaryotic cell cycle. It is required in higher cells for entry into S-phase and mitosis. p34 is a component of the kinase complex that phosphorylates the repetitive C-terminus of RNA polymerase II                                                                                                                                                                                                                                                                                                                                                |
| CTNNB1  | 9606.ENSPO0000344456 | catenin (cadherin-associated protein), beta 1, 88kDa; Involved in the regulation of cell adhesion and in signal transduction through the Wnt pathway                                                                                                                                                                                                                                                                                                                                                                                                                                                                   |
| DNAJA1  | 9606.ENSPO0000369127 | DnaJ (Hsp40) homolog, subfamily A, member 1; Co-chaperone of Hsc70. Seems to play a role in protein import into mitochondria                                                                                                                                                                                                                                                                                                                                                                                                                                                                                           |
| PPP4C   | 9606.ENSPO0000279387 | protein phosphatase 4 (formerly X), catalytic subunit; Protein phosphatase that is involved in many processes such as microtubule organization at centrosomes, maturation of spliceosomal snRNPs, apoptosis, tumor necrosis factor (TNF)-alpha signaling, activation of c-Jun N-terminal kinase MAPK8, regulation of histone acetylation, DNA damage checkpoint signaling, NF-kappa- B activation and cell migration. The PPP4C-PPP4R1 PP4 complex may play a role in dephosphorylation and regulation of HDAC3. The PPP4C-PPP4R2-PPP4R3A PP4 complex specifically dephosphorylates H2AFX phosphorylated on Ser- [...] |
| PHB     | 9606.ENSPO0000300408 | prohibitin; Prohibitin inhibits DNA synthesis. It has a role in regulating proliferation. As yet it is unclear if the protein or the mRNA exhibits this effect. May play a role in regulating mitochondrial respiration activity and in aging                                                                                                                                                                                                                                                                                                                                                                          |
| TRPM7   | 9606.ENSPO0000320239 | transient receptor potential cation channel, subfamily M, member 7; Essential ion channel and serine/threonine-protein kinase. Divalent cation channel permeable to calcium and magnesium. Has a central role in magnesium ion homeostasis and in the regulation of anoxic neuronal cell death. The kinase activity is essential for the channel function. May be involved in a fundamental process that adjusts plasma membrane divalent cation fluxes according to the metabolic state of the cell. Phosphorylates annexin A1 (ANXA1)                                                                                |

|         |                      |                                                                                                                                                                                                                                                                                                                                                                                                                                                                                                                                                                                                                       |
|---------|----------------------|-----------------------------------------------------------------------------------------------------------------------------------------------------------------------------------------------------------------------------------------------------------------------------------------------------------------------------------------------------------------------------------------------------------------------------------------------------------------------------------------------------------------------------------------------------------------------------------------------------------------------|
| RUVBL2  | 9606.ENSPO0000221413 | RuvB-like 2 (E. coli); Possesses single-stranded DNA-stimulated ATPase and ATP-dependent DNA helicase (5' to 3') activity. Component of the NuA4 histone acetyltransferase complex which is involved in transcriptional activation of select genes principally by acetylation of nucleosomal histones H4 and H2A. This modification may both alter nucleosome - DNA interactions and promote interaction of the modified histones with other proteins which positively regulate transcription. This complex may be required for the activation of transcriptional programs associated with oncogene and proto-o [...] |
| MDH2    | 9606.ENSPO0000327070 | malate dehydrogenase 2, NAD (mitochondrial)                                                                                                                                                                                                                                                                                                                                                                                                                                                                                                                                                                           |
| CDC42   | 9606.ENSPO0000314458 | cell division cycle 42 (GTP binding protein, 25kDa); Plasma membrane-associated small GTPase which cycles between an active GTP-bound and an inactive GDP-bound state. In active state binds to a variety of effector proteins to regulate cellular responses. Involved in epithelial cell polarization processes. Causes the formation of thin, actin-rich surface projections called filopodia                                                                                                                                                                                                                      |
| CDC37L1 | 9606.ENSPO0000371278 | cell division cycle 37 homolog (S. cerevisiae)-like 1; Co-chaperone that binds to numerous proteins and promotes their interaction with Hsp70 and Hsp90 (By similarity)                                                                                                                                                                                                                                                                                                                                                                                                                                               |
| TPI1    | 9606.ENSPO0000379933 | triosephosphate isomerase 1                                                                                                                                                                                                                                                                                                                                                                                                                                                                                                                                                                                           |
| CRK     | 9606.ENSPO0000300574 | v-crk sarcoma virus CT10 oncogene homolog (avian); The Crk-I and Crk-II forms differ in their biological activities. Crk-II has less transforming activity than Crk-I. Crk- II mediates attachment-induced MAPK8 activation, membrane ruffling and cell motility in a Rac-dependent manner. Involved in phagocytosis of apoptotic cells and cell motility via its interaction with DOCK1 and DOCK4                                                                                                                                                                                                                    |
| HSPD1   | 9606.ENSPO0000340019 | heat shock 60kDa protein 1 (chaperonin); Implicated in mitochondrial protein import and macromolecular assembly. May facilitate the correct folding of imported proteins. May also prevent misfolding and promote the refolding and proper assembly of unfolded polypeptides generated under stress conditions in the mitochondrial matrix                                                                                                                                                                                                                                                                            |
| MYL3    | 9606.ENSPO0000292327 | myosin, light chain 3, alkali; ventricular, skeletal, slow; Regulatory light chain of myosin. Does not bind calcium                                                                                                                                                                                                                                                                                                                                                                                                                                                                                                   |
| PPP2R4  | 9606.ENSPO0000351885 | protein phosphatase 2A activator, regulatory subunit 4; Reversibly stimulates the variable phosphotyrosyl phosphatase activity of PP2A core heterodimer in presence of ATP and Mg(2+) (in vitro)                                                                                                                                                                                                                                                                                                                                                                                                                      |
| TP53    | 9606.ENSPO0000269305 | tumor protein p53; Acts as a tumor suppressor in many tumor types; induces growth arrest or apoptosis depending on the physiological circumstances and cell type. Involved in cell cycle regulation as a trans-activator that acts to negatively regulate cell division by controlling a set of genes required for this process. One of the activated genes is an inhibitor of cyclin-dependent kinases. Apoptosis induction seems to be mediated either by stimulation of BAX and FAS antigen expression, or by repression of Bcl-2 expression. Implicated in Notch signaling cross-over                             |
| APEX1   | 9606.ENSPO0000216714 | APEX nuclease (multifunctional DNA repair enzyme) 1; Repairs oxidative DNA damages in vitro. May have a role in protection against cell lethality and suppression of mutations. Removes the blocking groups from the 3'-termini of the DNA strand breaks generated by ionizing radiations and bleomycin                                                                                                                                                                                                                                                                                                               |
| PLG     | 9606.ENSPO0000308938 | plasminogen; Plasmin dissolves the fibrin of blood clots and acts as a proteolytic factor in a variety of other processes including embryonic development, tissue remodeling, tumor invasion, and inflammation; in ovulation it weakens the walls of the Graafian follicle. It activates the urokinase-type plasminogen activator, collagenases and several complement zymogens, such as C1 and C5. It cleaves fibrin, fibronectin, thrombospondin, laminin and von Willebrand factor. Its role in tissue remodeling and tumor invasion may be modulated by CSPG4                                                     |
| PPID    | 9606.ENSPO0000303754 | peptidylprolyl isomerase D; PPlases accelerate the folding of proteins. It catalyzes the cis-trans isomerization of proline imidic peptide bonds in oligopeptides (By similarity)                                                                                                                                                                                                                                                                                                                                                                                                                                     |
| PLAT    | 9606.ENSPO0000220809 | plasminogen activator, tissue; Converts the abundant, but inactive, zymogen plasminogen to plasmin by hydrolyzing a single Arg-Val bond in plasminogen. By controlling plasmin-mediated proteolysis, it plays an important role in tissue remodeling and degradation, in cell migration and many other physiopathological events. Play a direct role in facilitating neuronal migration                                                                                                                                                                                                                               |
| RAC2    | 9606.ENSPO0000249071 | ras-related C3 botulinum toxin substrate 2 (rho family, small GTP binding protein Rac2); Plasma membrane-associated small GTPase which cycles between an active GTP-bound and inactive GDP-bound state. In active state binds to a variety of effector proteins to regulate cellular responses, such as secretory processes, phagocytosis of apoptotic cells and epithelial cell polarization. Seems to be involved in the regulation of the NADPH oxidase                                                                                                                                                            |



|         |                      |                                                                                                                                                                                                                                                                                                                                                                                                                                                                                                                                                                                                                        |
|---------|----------------------|------------------------------------------------------------------------------------------------------------------------------------------------------------------------------------------------------------------------------------------------------------------------------------------------------------------------------------------------------------------------------------------------------------------------------------------------------------------------------------------------------------------------------------------------------------------------------------------------------------------------|
| GOT1    | 9606.ENSPO0000359539 | glutamic-oxaloacetic transaminase 1, soluble (aspartate aminotransferase 1)                                                                                                                                                                                                                                                                                                                                                                                                                                                                                                                                            |
| CSNK2A1 | 9606.ENSPO0000217244 | casein kinase 2, alpha 1 polypeptide pseudogene; Casein kinases are operationally defined by their preferential utilization of acidic proteins such as caseins as substrates. The alpha and alpha' chains contain the catalytic site. Participates in Wnt signaling. CK2 phosphorylates 'Ser-392' of p53/TP53 following UV irradiation                                                                                                                                                                                                                                                                                 |
| CALM1   | 9606.ENSPO0000349467 | calmodulin 1 (phosphorylase kinase, delta); Calmodulin mediates the control of a large number of enzymes and other proteins by Ca(2+). Among the enzymes to be stimulated by the calmodulin-Ca(2+) complex are a number of protein kinases and phosphatases. Together with CEP110 and centrin, is involved in a genetic pathway that regulates the centrosome cycle and progression through cytokinesis                                                                                                                                                                                                                |
| MAPK14  | 9606.ENSPO0000229794 | mitogen-activated protein kinase 14; Responds to activation by environmental stress, pro- inflammatory cytokines and lipopolysaccharide (LPS) by phosphorylating a number of transcription factors, such as ELK1 and ATF2 and several downstream kinases, such as MAPKAPK2 and MAPKAPK5. Plays a critical role in the production of some cytokines, for example IL-6. May play a role in stabilization of EPO mRNA during hypoxic stress. Isoform Mxi2 activation is stimulated by mitogens and oxidative stress and only poorly phosphorylates ELK1 and ATF2. Isoform Exp may play a role in the early onset o [...]  |
| CASP6   | 9606.ENSPO0000265164 | caspase 6, apoptosis-related cysteine peptidase; Involved in the activation cascade of caspases responsible for apoptosis execution. Cleaves poly(ADP-ribose) polymerase in vitro, as well as lamins. Overexpression promotes programmed cell death                                                                                                                                                                                                                                                                                                                                                                    |
| ZNF148  | 9606.ENSPO0000353863 | zinc finger protein 148; Involved in transcriptional regulation. Represses the transcription of a number of genes including gastrin, stromelysin and enolase. Binds to the G-rich box in the enhancer region of these genes                                                                                                                                                                                                                                                                                                                                                                                            |
| CD44    | 9606.ENSPO0000278385 | CD44 molecule (Indian blood group); Receptor for hyaluronic acid (HA). Mediates cell-cell and cell-matrix interactions through its affinity for HA, and possibly also through its affinity for other ligands such as osteopontin, collagens, and matrix metalloproteinases (MMPs). Adhesion with HA plays an important role in cell migration, tumor growth and progression. Also involved in lymphocyte activation, recirculation and homing, and in hematopoiesis. Altered expression or dysfunction causes numerous pathogenic phenotypes. Great protein heterogeneity due to numerous alternative splicing a [...] |
| RHOH    | 9606.ENSPO0000371219 | ras homolog gene family, member H; Negative regulator of hematopoietic progenitor cell proliferation, survival and migration. Critical regulator of thymocyte development and T-cell antigen receptor (TCR) signaling by mediating recruitment and activation of ZAP70. Required for phosphorylation of CD3Z, membrane translocation of ZAP70 and subsequent activation of the ZAP70-mediated pathways. Essential for efficient beta-selection and positive selection by promoting the ZAP70-dependent phosphorylation of the LAT signalosome during pre-TCR and TCR signaling. Crucial for thymocyte maturation [...] |
| EMD     | 9606.ENSPO0000358857 | emerin; Stabilizes and promotes the formation of a nuclear actin cortical network. Stimulates actin polymerization in vitro by binding and stabilizing the pointed end of growing filaments. Inhibits beta-catenin activity by preventing its accumulation in the nucleus. Acts by influencing the nuclear accumulation of beta- catenin through a CRM1-dependent export pathway. Links centrosomes to the nuclear envelope via a microtubule association. EMD and BAF are cooperative cofactors of HIV-1 infection. Association of EMD with the viral DNA requires the presence of BAF and viral integrase. The [...] |
| COL2A1  | 9606.ENSPO0000369889 | collagen, type II, alpha 1; Type II collagen is specific for cartilaginous tissues. It is essential for the normal embryonic development of the skeleton, for linear growth and for the ability of cartilage to resist compressive forces                                                                                                                                                                                                                                                                                                                                                                              |
| TNNI3   | 9606.ENSPO0000341838 | troponin I type 3 (cardiac); Troponin I is the inhibitory subunit of troponin, the thin filament regulatory complex which confers calcium-sensitivity to striated muscle actomyosin ATPase activity                                                                                                                                                                                                                                                                                                                                                                                                                    |
| RAF1    | 9606.ENSPO0000251849 | v-raf-1 murine leukemia viral oncogene homolog 1; Involved in the transduction of mitogenic signals from the cell membrane to the nucleus. Part of the Ras-dependent signaling pathway from receptors to the nucleus. Protects cells from apoptosis mediated by STK3                                                                                                                                                                                                                                                                                                                                                   |
| STRN    | 9606.ENSPO0000263918 | striatin, calmodulin binding protein; Calmodulin-binding protein which may function as scaffolding or signaling protein and may play a role in dendritic Ca(2+) signaling                                                                                                                                                                                                                                                                                                                                                                                                                                              |
| FKBP5   | 9606.ENSPO0000338160 | FK506 binding protein 5; Interacts with functionally mature heterooligomeric progesterone receptor complexes along with HSP90 and TEBP                                                                                                                                                                                                                                                                                                                                                                                                                                                                                 |

|         |                       |                                                                                                                                                                                                                                                                                                                                                                                                                                                                                                                                                                                                                        |
|---------|-----------------------|------------------------------------------------------------------------------------------------------------------------------------------------------------------------------------------------------------------------------------------------------------------------------------------------------------------------------------------------------------------------------------------------------------------------------------------------------------------------------------------------------------------------------------------------------------------------------------------------------------------------|
| SRF     | 9606.ENSPO00000265354 | serum response factor (c-fos serum response element-binding transcription factor); SRF is a transcription factor that binds to the serum response element (SRE), a short sequence of dyad symmetry located 300 bp to the 5' of the site of transcription initiation of some genes (such as FOS). Required for cardiac differentiation and maturation                                                                                                                                                                                                                                                                   |
| PXN     | 9606.ENSPO00000228307 | paxillin; Cytoskeletal protein involved in actin-membrane attachment at sites of cell adhesion to the extracellular matrix (focal adhesion)                                                                                                                                                                                                                                                                                                                                                                                                                                                                            |
| PPP2R3B | 9606.ENSPO00000375080 | protein phosphatase 2 (formerly 2A), regulatory subunit B'', beta; The B regulatory subunit might modulate substrate selectivity and catalytic activity, and also might direct the localization of the catalytic enzyme to a particular subcellular compartment                                                                                                                                                                                                                                                                                                                                                        |
| TUBB2C  | 9606.ENSPO00000341289 | tubulin, beta 2C; Tubulin is the major constituent of microtubules. It binds two moles of GTP, one at an exchangeable site on the beta chain and one at a non-exchangeable site on the alpha-chain (By similarity)                                                                                                                                                                                                                                                                                                                                                                                                     |
| CASP8   | 9606.ENSPO00000351273 | caspase 8, apoptosis-related cysteine peptidase; Most upstream protease of the activation cascade of caspases responsible for the TNFRSF6/FAS mediated and TNFRSF1A induced cell death. Binding to the adapter molecule FADD recruits it to either receptor. The resulting aggregate called death- inducing signaling complex (DISC) performs CASP8 proteolytic activation. The active dimeric enzyme is then liberated from the DISC and free to activate downstream apoptotic proteases. Proteolytic fragments of the N-terminal propeptide (termed CAP3, CAP5 and CAP6) are likely retained in the DISC. Clea [...] |
| HDAC6   | 9606.ENSPO00000334061 | histone deacetylase 6; Responsible for the deacetylation of lysine residues on the N-terminal part of the core histones (H2A, H2B, H3 and H4). Histone deacetylation gives a tag for epigenetic repression and plays an important role in transcriptional regulation, cell cycle progression and developmental events. Histone deacetylases act via the formation of large multiprotein complexes (By similarity). Plays a central role in microtubule-dependent cell motility via deacetylation of tubulin                                                                                                            |
| NOS3    | 9606.ENSPO00000297494 | nitric oxide synthase 3 (endothelial cell); Produces nitric oxide (NO) which is implicated in vascular smooth muscle relaxation through a cGMP-mediated signal transduction pathway. NO mediates vascular endothelial growth factor (VEGF)-induced angiogenesis in coronary vessels and promotes blood clotting through the activation of platelets                                                                                                                                                                                                                                                                    |
| GDI2    | 9606.ENSPO00000369538 | GDP dissociation inhibitor 2; Regulates the GDP/GTP exchange reaction of most Rab proteins by inhibiting the dissociation of GDP from them, and the subsequent binding of GTP to them                                                                                                                                                                                                                                                                                                                                                                                                                                  |

## Function

| Feature                                                                          | Genes in the network | Genes in the genome with the function |
|----------------------------------------------------------------------------------|----------------------|---------------------------------------|
| protein phosphatase type 2A complex                                              | 12                   | 15                                    |
| protein serine/threonine kinase activity                                         | 35                   | 283                                   |
| axon guidance                                                                    | 24                   | 294                                   |
| regulation of cysteine-type endopeptidase activity                               | 20                   | 131                                   |
| protein serine/threonine phosphatase complex                                     | 7                    | 32                                    |
| response to growth factor stimulus                                               | 22                   | 212                                   |
| regulation of cysteine-type endopeptidase activity involved in apoptotic process | 19                   | 128                                   |
| regulation of innate immune response                                             | 11                   | 182                                   |
| pattern recognition receptor signaling pathway                                   | 9                    | 103                                   |
| innate immune response-activating signal transduction                            | 9                    | 106                                   |
| MyD88-dependent toll-like receptor signaling pathway                             | 8                    | 74                                    |
| activation of innate immune response                                             | 9                    | 108                                   |
| heat shock protein binding                                                       | 12                   | 28                                    |
| muscle system process                                                            | 26                   | 195                                   |
| regulation of endopeptidase activity                                             | 11                   | 198                                   |
| protein folding                                                                  | 23                   | 111                                   |
| regulation of peptidase activity                                                 | 20                   | 205                                   |
| cellular response to growth factor stimulus                                      | 20                   | 204                                   |
| small GTPase mediated signal transduction                                        | 12                   | 264                                   |
| intracellular receptor mediated signaling pathway                                | 19                   | 170                                   |
| positive regulation of innate immune response                                    | 9                    | 129                                   |
| muscle structure development                                                     | 11                   | 222                                   |
| fibroblast growth factor receptor signaling pathway                              | 15                   | 129                                   |
| muscle contraction                                                               | 24                   | 176                                   |
| TRIF-dependent toll-like receptor signaling pathway                              | 7                    | 62                                    |
| toll-like receptor signaling pathway                                             | 8                    | 95                                    |
| response to fibroblast growth factor stimulus                                    | 9                    | 136                                   |
| cellular response to fibroblast growth factor stimulus                           | 9                    | 136                                   |
| actin filament-based process                                                     | 26                   | 293                                   |
| regulation of defense response                                                   | 12                   | 295                                   |
| toll-like receptor 3 signaling pathway                                           | 7                    | 66                                    |
| MyD88-independent toll-like receptor signaling pathway                           | 7                    | 66                                    |
| cellular component disassembly involved in apoptosis                             | 14                   | 68                                    |

|                                                                                                  |    |     |
|--------------------------------------------------------------------------------------------------|----|-----|
| toll-like receptor 1 signaling pathway                                                           | 7  | 69  |
| regulation of protein serine/threonine kinase activity                                           | 20 | 249 |
| de novo' protein folding                                                                         | 14 | 42  |
| toll-like receptor 2 signaling pathway                                                           | 7  | 72  |
| nucleotide-binding domain, leucine rich repeat containing receptor signaling pathway             | 6  | 43  |
| activation of cysteine-type endopeptidase activity                                               | 13 | 72  |
| activation of cysteine-type endopeptidase activity involved in apoptotic process                 | 13 | 72  |
| immune response-activating signal transduction                                                   | 10 | 201 |
| platelet activation                                                                              | 24 | 207 |
| immune response-regulating signaling pathway                                                     | 10 | 208 |
| activation of cysteine-type endopeptidase activity involved in apoptotic process by cytochrome c | 4  | 10  |
| Toll signaling pathway                                                                           | 7  | 78  |
| cell-substrate adherens junction                                                                 | 7  | 79  |
| positive regulation of defense response                                                          | 9  | 165 |
| protein phosphatase binding                                                                      | 10 | 51  |
| cell-substrate junction                                                                          | 7  | 83  |
| toll-like receptor 4 signaling pathway                                                           | 7  | 83  |
| positive regulation of cysteine-type endopeptidase activity                                      | 14 | 84  |
| positive regulation of cysteine-type endopeptidase activity involved in apoptotic process        | 14 | 84  |
| positive regulation of endopeptidase activity                                                    | 14 | 87  |
| activation of immune response                                                                    | 10 | 232 |
| activation of MAPKK activity                                                                     | 5  | 30  |
| positive regulation of peptidase activity                                                        | 14 | 92  |
| Ras protein signal transduction                                                                  | 8  | 135 |
| protein phosphatase 2A binding                                                                   | 4  | 14  |
| H4/H2A histone acetyltransferase complex                                                         | 4  | 14  |
| protein phosphatase type 2A regulator activity                                                   | 11 | 14  |
| NuA4 histone acetyltransferase complex                                                           | 4  | 14  |
| epidermal growth factor receptor signaling pathway                                               | 8  | 148 |
| response to topologically incorrect protein                                                      | 17 | 103 |
| de novo' posttranslational protein folding                                                       | 11 | 37  |
| adherens junction                                                                                | 20 | 108 |
| actin-myosin filament sliding                                                                    | 11 | 38  |
| muscle filament sliding                                                                          | 11 | 38  |
| positive regulation of immune response                                                           | 10 | 272 |
| actin-mediated cell contraction                                                                  | 11 | 39  |
| nerve growth factor receptor signaling pathway                                                   | 17 | 216 |
| cellular component disassembly                                                                   | 9  | 220 |
| myofibril                                                                                        | 14 | 74  |
| anchoring junction                                                                               | 21 | 116 |

|                                                                        |    |     |
|------------------------------------------------------------------------|----|-----|
| contractile fiber part                                                 | 14 | 77  |
| protein domain specific binding                                        | 19 | 292 |
| focal adhesion                                                         | 19 | 77  |
| induction of apoptosis by intracellular signals                        | 11 | 79  |
| phosphatase binding                                                    | 11 | 84  |
| muscle cell differentiation                                            | 7  | 130 |
| contractile fiber                                                      | 14 | 85  |
| actin filament-based movement                                          | 11 | 50  |
| unfolded protein binding                                               | 12 | 53  |
| cytoplasmic pattern recognition receptor signaling pathway             | 4  | 26  |
| nucleotide-binding oligomerization domain containing signaling pathway | 4  | 26  |
| basolateral plasma membrane                                            | 21 | 147 |
| negative regulation of cellular protein metabolic process              | 8  | 205 |
| response to unfolded protein                                           | 15 | 98  |
| cellular senescence                                                    | 4  | 29  |
| IkappaB kinase complex                                                 | 3  | 10  |
| cellular component disassembly at cellular level                       | 8  | 217 |
| regulation of muscle cell differentiation                              | 5  | 63  |
| protein phosphatase regulator activity                                 | 11 | 31  |
| sarcomere                                                              | 12 | 64  |
| histone modification                                                   | 8  | 228 |
| G1/S transition of mitotic cell cycle                                  | 7  | 169 |
| chaperone-mediated protein complex assembly                            | 8  | 12  |
| I band                                                                 | 4  | 34  |
| negative regulation of protein metabolic process                       | 8  | 232 |
| covalent chromatin modification                                        | 8  | 233 |
| regulation of MAP kinase activity                                      | 14 | 173 |
| positive regulation of muscle cell differentiation                     | 4  | 37  |
| actin binding                                                          | 12 | 122 |
| phosphatase regulator activity                                         | 11 | 38  |
| regulation of reactive oxygen species metabolic process                | 4  | 39  |
| activation of protein kinase activity                                  | 7  | 184 |
| actin cytoskeleton organization                                        | 20 | 252 |
| platelet degranulation                                                 | 13 | 80  |
| DNA replication                                                        | 15 | 191 |
| negative regulation of hydrolase activity                              | 7  | 191 |
| structural constituent of muscle                                       | 9  | 42  |
| cytosolic part                                                         | 6  | 134 |
| negative regulation of cysteine-type endopeptidase activity            | 4  | 45  |
| response to biotic stimulus                                            | 20 | 272 |
| anti-apoptosis                                                         | 19 | 202 |
| regulation of peptidyl-tyrosine phosphorylation                        | 5  | 87  |
| cell junction                                                          | 26 | 273 |
| gluconeogenesis                                                        | 4  | 46  |
| cell junction assembly                                                 | 18 | 143 |
| cell aging                                                             | 4  | 47  |

|                                                                          |    |     |
|--------------------------------------------------------------------------|----|-----|
| protein serine/threonine/tyrosine kinase activity                        | 3  | 18  |
| activation of MAPK activity                                              | 5  | 90  |
| protein complex binding                                                  | 14 | 146 |
| smooth muscle cell differentiation                                       | 3  | 19  |
| response to virus                                                        | 6  | 150 |
| androgen receptor signaling pathway                                      | 4  | 50  |
| regulation of I-kappaB kinase/NF-kappaB cascade                          | 6  | 150 |
| heart morphogenesis                                                      | 12 | 96  |
| regulation of transcription involved in G1/S phase of mitotic cell cycle | 3  | 20  |
| MAPK cascade                                                             | 8  | 293 |
| cellular response to peptide hormone stimulus                            | 7  | 220 |
| cell junction organization                                               | 18 | 154 |
| positive regulation of protein serine/threonine kinase activity          | 13 | 154 |
| chromatin modification                                                   | 8  | 299 |
| muscle organ development                                                 | 13 | 158 |
| internal protein amino acid acetylation                                  | 5  | 101 |
| cellular response to insulin stimulus                                    | 6  | 160 |
| hexose biosynthetic process                                              | 4  | 55  |
| negative regulation of proteolysis                                       | 3  | 22  |
| response to peptide hormone stimulus                                     | 7  | 230 |
| response to insulin stimulus                                             | 6  | 164 |
| regulation of cyclin-dependent protein kinase activity                   | 4  | 57  |
| aging                                                                    | 4  | 57  |
| negative regulation of phosphorus metabolic process                      | 4  | 58  |
| negative regulation of phosphate metabolic process                       | 4  | 58  |
| regulation of muscle system process                                      | 4  | 60  |
| Wnt receptor signaling pathway                                           | 6  | 171 |
| protein acetylation                                                      | 5  | 110 |
| heart development                                                        | 14 | 173 |
| I-kappaB kinase/NF-kappaB cascade                                        | 13 | 174 |
| cardiac muscle tissue development                                        | 10 | 62  |
| microtubule-based process                                                | 7  | 247 |
| Z disc                                                                   | 3  | 26  |
| protein acylation                                                        | 5  | 116 |
| peptidyl-tyrosine phosphorylation                                        | 5  | 116 |
| peptidyl-lysine modification                                             | 5  | 117 |
| structural constituent of cytoskeleton                                   | 10 | 65  |
| monosaccharide biosynthetic process                                      | 4  | 65  |
| histone deacetylation                                                    | 3  | 27  |
| chaperone binding                                                        | 3  | 27  |
| peptidyl-tyrosine modification                                           | 5  | 118 |
| filopodium                                                               | 3  | 28  |
| ATP catabolic process                                                    | 9  | 67  |
| positive regulation of MAP kinase activity                               | 5  | 121 |

|                                                             |    |     |
|-------------------------------------------------------------|----|-----|
| positive regulation of I-kappaB kinase/NF-kappaB cascade    | 5  | 124 |
| histone acetyltransferase complex                           | 4  | 70  |
| cardiac muscle tissue morphogenesis                         | 9  | 31  |
| negative regulation of blood coagulation                    | 3  | 31  |
| signal transduction in response to DNA damage               | 5  | 128 |
| protein deacetylation                                       | 3  | 31  |
| negative regulation of hemostasis                           | 3  | 31  |
| nitric oxide biosynthetic process                           | 3  | 31  |
| extrinsic to membrane                                       | 4  | 74  |
| protein deacylation                                         | 3  | 32  |
| muscle organ morphogenesis                                  | 9  | 33  |
| negative regulation of coagulation                          | 3  | 33  |
| cysteine-type endopeptidase activity                        | 3  | 33  |
| muscle tissue morphogenesis                                 | 9  | 33  |
| proteolysis involved in cellular protein catabolic process  | 7  | 283 |
| intracellular steroid hormone receptor signaling pathway    | 4  | 77  |
| peptidyl-serine phosphorylation                             | 4  | 77  |
| cellular response to hormone stimulus                       | 16 | 283 |
| internal side of plasma membrane                            | 4  | 78  |
| nuclear chromosome                                          | 6  | 208 |
| endopeptidase activity                                      | 5  | 138 |
| base-excision repair                                        | 3  | 35  |
| ATP metabolic process                                       | 10 | 80  |
| cellular protein catabolic process                          | 7  | 292 |
| reactive oxygen species metabolic process                   | 4  | 81  |
| alcohol biosynthetic process                                | 4  | 82  |
| insulin receptor signaling pathway                          | 5  | 143 |
| intermediate filament cytoskeleton                          | 16 | 83  |
| peptidyl-serine modification                                | 4  | 83  |
| adherens junction organization                              | 3  | 37  |
| regulation of cell growth                                   | 7  | 183 |
| negative regulation of intracellular protein kinase cascade | 5  | 90  |
| cellular response to light stimulus                         | 3  | 24  |
| peroxidase activity                                         | 3  | 24  |
| cell growth                                                 | 8  | 238 |
| oxidoreductase activity, acting on peroxide as acceptor     | 3  | 24  |
| regulation of stress fiber assembly                         | 3  | 24  |
| transcription regulatory region DNA binding                 | 8  | 235 |
| regulatory region nucleic acid binding                      | 8  | 236 |
| regulatory region DNA binding                               | 8  | 236 |
| protein localization in membrane                            | 4  | 52  |
| plasma membrane organization                                | 4  | 51  |
| regulation of nitric oxide biosynthetic process             | 3  | 23  |
| positive regulation of organelle organization               | 6  | 132 |
| secretory granule                                           | 6  | 130 |
| vesicle lumen                                               | 4  | 49  |
| muscle tissue development                                   | 6  | 127 |

|                                                          |   |     |
|----------------------------------------------------------|---|-----|
| cytoplasmic membrane-bounded vesicle lumen               | 4 | 49  |
| secretory granule lumen                                  | 4 | 49  |
| regulation of ATPase activity                            | 3 | 22  |
| cell-cell adherens junction                              | 3 | 22  |
| positive regulation of glucose metabolic process         | 3 | 22  |
| cellular component disassembly                           | 8 | 220 |
| muscle structure development                             | 8 | 222 |
| platelet alpha granule lumen                             | 4 | 47  |
| regulation of MAPK cascade                               | 8 | 223 |
| cellular response to UV                                  | 3 | 21  |
| peptidyl-proline modification                            | 3 | 21  |
| regulation of cytoskeleton organization                  | 7 | 172 |
| striated muscle contraction                              | 4 | 45  |
| cellular component disassembly at cellular level         | 8 | 217 |
| regulation of protein import into nucleus                | 5 | 80  |
| macrophage activation                                    | 3 | 20  |
| actin filament bundle assembly                           | 4 | 46  |
| endothelial cell migration                               | 5 | 79  |
| nitric oxide metabolic process                           | 4 | 42  |
| peptidyl-prolyl cis-trans isomerase activity             | 3 | 18  |
| protein peptidyl-prolyl isomerization                    | 3 | 18  |
| response to estradiol stimulus                           | 3 | 18  |
| response to steroid hormone stimulus                     | 5 | 76  |
| receptor complex                                         | 6 | 117 |
| positive regulation of actin filament bundle assembly    | 3 | 19  |
| positive regulation of nitric oxide biosynthetic process | 3 | 19  |
| cis-trans isomerase activity                             | 3 | 19  |
| striated muscle tissue development                       | 6 | 119 |
| positive regulation of cellular component movement       | 7 | 154 |
| cadherin binding                                         | 3 | 17  |
| positive regulation of epithelial cell proliferation     | 5 | 72  |
| dephosphorylation                                        | 8 | 204 |
| antioxidant activity                                     | 4 | 41  |
| negative regulation of lipid metabolic process           | 4 | 41  |
| cell-substrate junction assembly                         | 4 | 39  |
| anatomical structure homeostasis                         | 6 | 108 |
| positive regulation of locomotion                        | 7 | 153 |
| positive regulation of cell motility                     | 7 | 148 |
| apical junction assembly                                 | 4 | 38  |
| response to interleukin-1                                | 4 | 38  |
| monosaccharide metabolic process                         | 8 | 196 |
| phospholipid binding                                     | 7 | 149 |
| steroid hormone mediated signaling pathway               | 3 | 15  |
| positive regulation of cell migration                    | 7 | 145 |
| cell-matrix adhesion                                     | 6 | 91  |
| protein import into nucleus                              | 7 | 131 |
| cellular carbohydrate catabolic process                  | 6 | 92  |
| regulation of cell morphogenesis                         | 8 | 177 |



|                                                          |    |     |
|----------------------------------------------------------|----|-----|
| nuclear import                                           | 7  | 134 |
| heart contraction                                        | 5  | 60  |
| vasculature development                                  | 10 | 281 |
| regulation of cell division                              | 4  | 33  |
| heart process                                            | 5  | 61  |
| tissue morphogenesis                                     | 8  | 182 |
| regulation of lipid metabolic process                    | 7  | 137 |
| myosin binding                                           | 3  | 14  |
| cell-cell junction organization                          | 6  | 99  |
| blood vessel morphogenesis                               | 9  | 239 |
| carbohydrate catabolic process                           | 6  | 101 |
| protein localization in plasma membrane                  | 4  | 36  |
| FK506 binding                                            | 3  | 15  |
| positive regulation of monooxygenase activity            | 3  | 15  |
| positive regulation of stress fiber assembly             | 3  | 15  |
| macrolide binding                                        | 3  | 15  |
| establishment of protein localization in membrane        | 4  | 27  |
| actin filament bundle                                    | 4  | 27  |
| actomyosin structure organization                        | 4  | 27  |
| response to other organism                               | 10 | 257 |
| hexose metabolic process                                 | 8  | 162 |
| cardiac chamber development                              | 5  | 52  |
| cell-substrate adhesion                                  | 7  | 122 |
| regulation of tumor necrosis factor biosynthetic process | 3  | 11  |
| Hsp90 protein binding                                    | 3  | 11  |
| tumor necrosis factor biosynthetic process               | 3  | 11  |
| blood vessel development                                 | 10 | 263 |
| stress fiber assembly                                    | 4  | 29  |
| cell-cell junction assembly                              | 5  | 55  |
| actin filament organization                              | 7  | 126 |
| regulation of protein localization                       | 9  | 218 |
| negative regulation of MAPK cascade                      | 5  | 57  |
| positive regulation of nitric-oxide synthase activity    | 3  | 10  |
| regulation of heart rate                                 | 3  | 10  |
| protein dephosphorylation                                | 7  | 117 |
| angiogenesis                                             | 9  | 203 |
| stress fiber                                             | 4  | 26  |
| establishment of protein localization in plasma membrane | 4  | 26  |
| regulation of cell adhesion                              | 8  | 158 |
| myofibril assembly                                       | 4  | 23  |
| regulation of establishment of protein localization      | 9  | 191 |
| regulation of transmembrane transport                    | 8  | 148 |
| cardiac chamber morphogenesis                            | 5  | 47  |
| alcohol catabolic process                                | 6  | 77  |
| positive regulation of cellular component organization   | 11 | 297 |
| regulation of endopeptidase activity                     | 9  | 198 |

|                                                                        |    |     |
|------------------------------------------------------------------------|----|-----|
| protein localization to nucleus                                        | 8  | 155 |
| regulation of cellular component biogenesis                            | 9  | 200 |
| cardiac ventricle development                                          | 5  | 43  |
| protein maturation                                                     | 6  | 72  |
| cellular protein complex assembly                                      | 9  | 174 |
| glucose metabolic process                                              | 8  | 134 |
| hexose catabolic process                                               | 6  | 66  |
| cell adhesion molecule binding                                         | 5  | 40  |
| monosaccharide catabolic process                                       | 6  | 69  |
| cardiac ventricle morphogenesis                                        | 5  | 38  |
| regulation of establishment of protein localization in plasma membrane | 4  | 19  |
| exocytosis                                                             | 9  | 168 |
| regulation of oxidoreductase activity                                  | 6  | 57  |
| cell-cell junction                                                     | 9  | 158 |
| glucose catabolic process                                              | 6  | 52  |
| regulation of locomotion                                               | 12 | 278 |
| actomyosin                                                             | 5  | 31  |
| response to reactive oxygen species                                    | 6  | 54  |
| beta-catenin binding                                                   | 6  | 45  |
| protein import                                                         | 10 | 173 |
| regulation of cell motility                                            | 12 | 262 |
| regulation of nitric-oxide synthase activity                           | 5  | 28  |
| cellular response to reactive oxygen species                           | 6  | 43  |
| glycolysis                                                             | 6  | 43  |
| ventricular cardiac muscle tissue development                          | 5  | 23  |
| response to oxidative stress                                           | 9  | 125 |
| regulation of cell migration                                           | 12 | 245 |
| inflammatory response                                                  | 12 | 239 |
| ventricular cardiac muscle tissue morphogenesis                        | 5  | 23  |
| regulation of cellular component movement                              | 13 | 275 |
| regulation of monooxygenase activity                                   | 6  | 38  |
| actin cytoskeleton                                                     | 13 | 255 |
| nucleobase-containing small molecule interconversion                   | 5  | 18  |
| cellular response to oxidative stress                                  | 8  | 64  |
| calcium-dependent phospholipid binding                                 | 5  | 14  |
| protein refolding                                                      | 5  | 10  |
| cell-substrate adherens junction                                       | 13 | 79  |
| cell-substrate junction                                                | 13 | 83  |
| intermediate filament                                                  | 12 | 44  |
